# Supplementary material for: Crowning lithium ions in hole transport layer toward stable perovskite solar cells
Source: Research Square preprint supplement (doi:10.21203/rs.3.rs-1142151/v1), 2021-12-08
Supplement: Supplementary file 1 [file 7720ae30f7bd127284d6196a.docx]

**Supplementary Materials**

**Crowning lithium ions in hole transport layer toward stable perovskite solar cells**

Ying Shen, Kaimo Deng*, Qinghua Chen, Gui Gao, Liang Li*

School of Physical Science and Technology, Jiangsu Key Laboratory of Thin Films, Center for Energy Conversion Materials & Physics, Soochow University, Suzhou 215006, China

*Corresponding author. Email: dkm@suda.edu.cn; lli@suda.edu.cn

Supplementary Note 1

We studied the solvation energy of Li+ ions with first-principal calculations. The interaction between Li+ ion and TBP molecule induces the formation of Li+/TBP complexes. As the number of surrounded TBP molecules increases, the solvation energy gradually decreases and the configuration becomes more stable. Four TBP molecules surrounding a Li+ ion is most favorable from the perspective of energy reduction. However, stable solvated structure cannot be obtained when more TBP molecules interact with Li+ ion. This could be attributed to the fact that four is the maximum number of unoccupied orbitals for Li+ (one 2s and three 2p orbitals) to accept donated lone electron pairs. [J. Am. Chem. Soc. 140, 16720-16730 (2018).] In the target precursor, the solvation structure is changed. Li+ ioncan interact with 12-crown-4 with a strong bonding andthe crowned Li+ ion can further interact with a TBP molecule. According to the calculation, the crowned Li+ ion can coordinate with a TBP molecule with a reduction in system energy. However, the steric hindrance effect blocks the interaction with one more TBP molecule. Thus Li+ ions in the target precursor exist most likely in the form of Li+/12-crown-4/TPB. Compared with the binding energy of Li+(TBP) and Li+(12-crown-4) complex, it can be found that there will need much more energy to desolvate 12-crown-4 than TBP, which can explain that we only observe the signal of Li+(12-crown-4) complex in the ESI-MS spectra of target precursor.

Supplementary Note 2

The absorption spectra of the control and target HTLs were measured after an oxidation process under oxygen exposure. Both the HTLs show a high absorption intensity in the UV range and an extra band appears around 500 nm. The former absorption band is assigned to the pristine Spiro-OMeTAD and the latter arises from oxidized species. The absorption intensity for the oxidized control HTL is a little higher than that of the oxidized target HTL. We also measured the conductivity of the two oxidized HTLs. By fitting the *I-V* curves, the conductivity can be calculated and the difference in conductivity for the two HTL is very small.

Supplementary Note 3

Although the p-type doping of Spiro-OMeTAD under oxidizing atmosphere has been extensively investigated, the phase transfer catalyzed doping is, to the best of our knowledge, unexplored before and therefore an appropriate model for Spiro-OMeTAD oxidation has not been built. Cyclic voltammetry is frequently used to investigate the oxygen redox couple in Li+-containing electrolyte. It is widely accepted that the reactions occurred on CV sweeps follow these principles. On the cathodic sweep, the reduction reactions of O2 to oxygen-reduction species adhere to an order of priority: O2-, O22-, and O2-. On the return anodic sweep, the oxidation reaction releasing O2 from these oxygen-related anions will proceed with a reverse order. In order to observe the oxidation current of O2-, the solvent should not react with it and a proper scan rate on the return anodic sweep is required to avoid the reaction of O2-.

Supplementary Note 4

Under the circumstance with oxygen and light, electrons that absorbs the energy from photons are excited from the highest occupied molecular orbital (HOMO) to the lowest unoccupied molecular orbital (LUMO) of Spiro-OMeTAD molecule and then the photoexcited electrons in the LUMO can be captured by O2 molecules due to a lower standard reduction potential for the reaction of O2 to O2- compared with the LUMO of Spiro-OMeTAD. The formation of other anions such as O22- and O2- can be proceeded subsequently. At the presence of Li+ ions, it is generally accepted that the chemical reactions occur following these order: Li++O2+e-→LiO2, LiO2+Li++e-→Li2O2, Li2O2+2Li++2e-→2Li2O. Among the three anions, O2- has a relatively low charge density and large radius, which is a moderately soft base, and the others are moderately hard base. Li+ ion with a small size is a hard Lewis acid. According to the hard-soft-acid-base (HSAB) theory, soft bases prefer soft acids and hard acids prefer hard bases. The hard Li+ions have a higher affinity for hard Lewis bases (O22- and O2-) than moderately soft base (O2-). Along with the reactions, the oxidized Spiro-OMeTAD radical cations form stable complexes with TFSI−, thus contributing to the p-type conductivity.

Supplementary Note 5

After a thin layer of the crown ether-Li+ complexes was deposited onto the perovskite film, the PL intensity of perovskite can be enhanced compared with the prinstine perovskite film when the excited light beam is incident from the surface or from the glass side. Because we pumped the perovskite films with high-energy photons (400 nm), [*Science*, 360, 1442-1446 (2018).] we expect that the incident light was absorbed strongly in the top or bottom region. This supports that there is a certain degree of migration for crown ether-Li+ complexes into the inner part of perovskite. A similar phenomenon had been reported elsewhere [*Nat. Commun.* 12, 3383-3383 (2021).].

Supplementary Note 6

The device configuration for SCLC measurement was ITO/HTL/Ag and the current under different bias voltages was measured under dark condition. The *I-V* curves can be divided into three parts: the ohmic region at low bias voltage, the trap-filling limited region with greatly increased current, and the trap-free child’s region. The defect state density (*n*traps) can be calculated according to the equation: *n*traps=2*ε0εV*TFL/*qL*2, where *q*, *L*, *V*TFL, *ε*, and *εo* are the elementary charge, the thickness of HTL, the trap-filling limit voltage, the relative dielectric, and the vacuum permittivity, respectively.


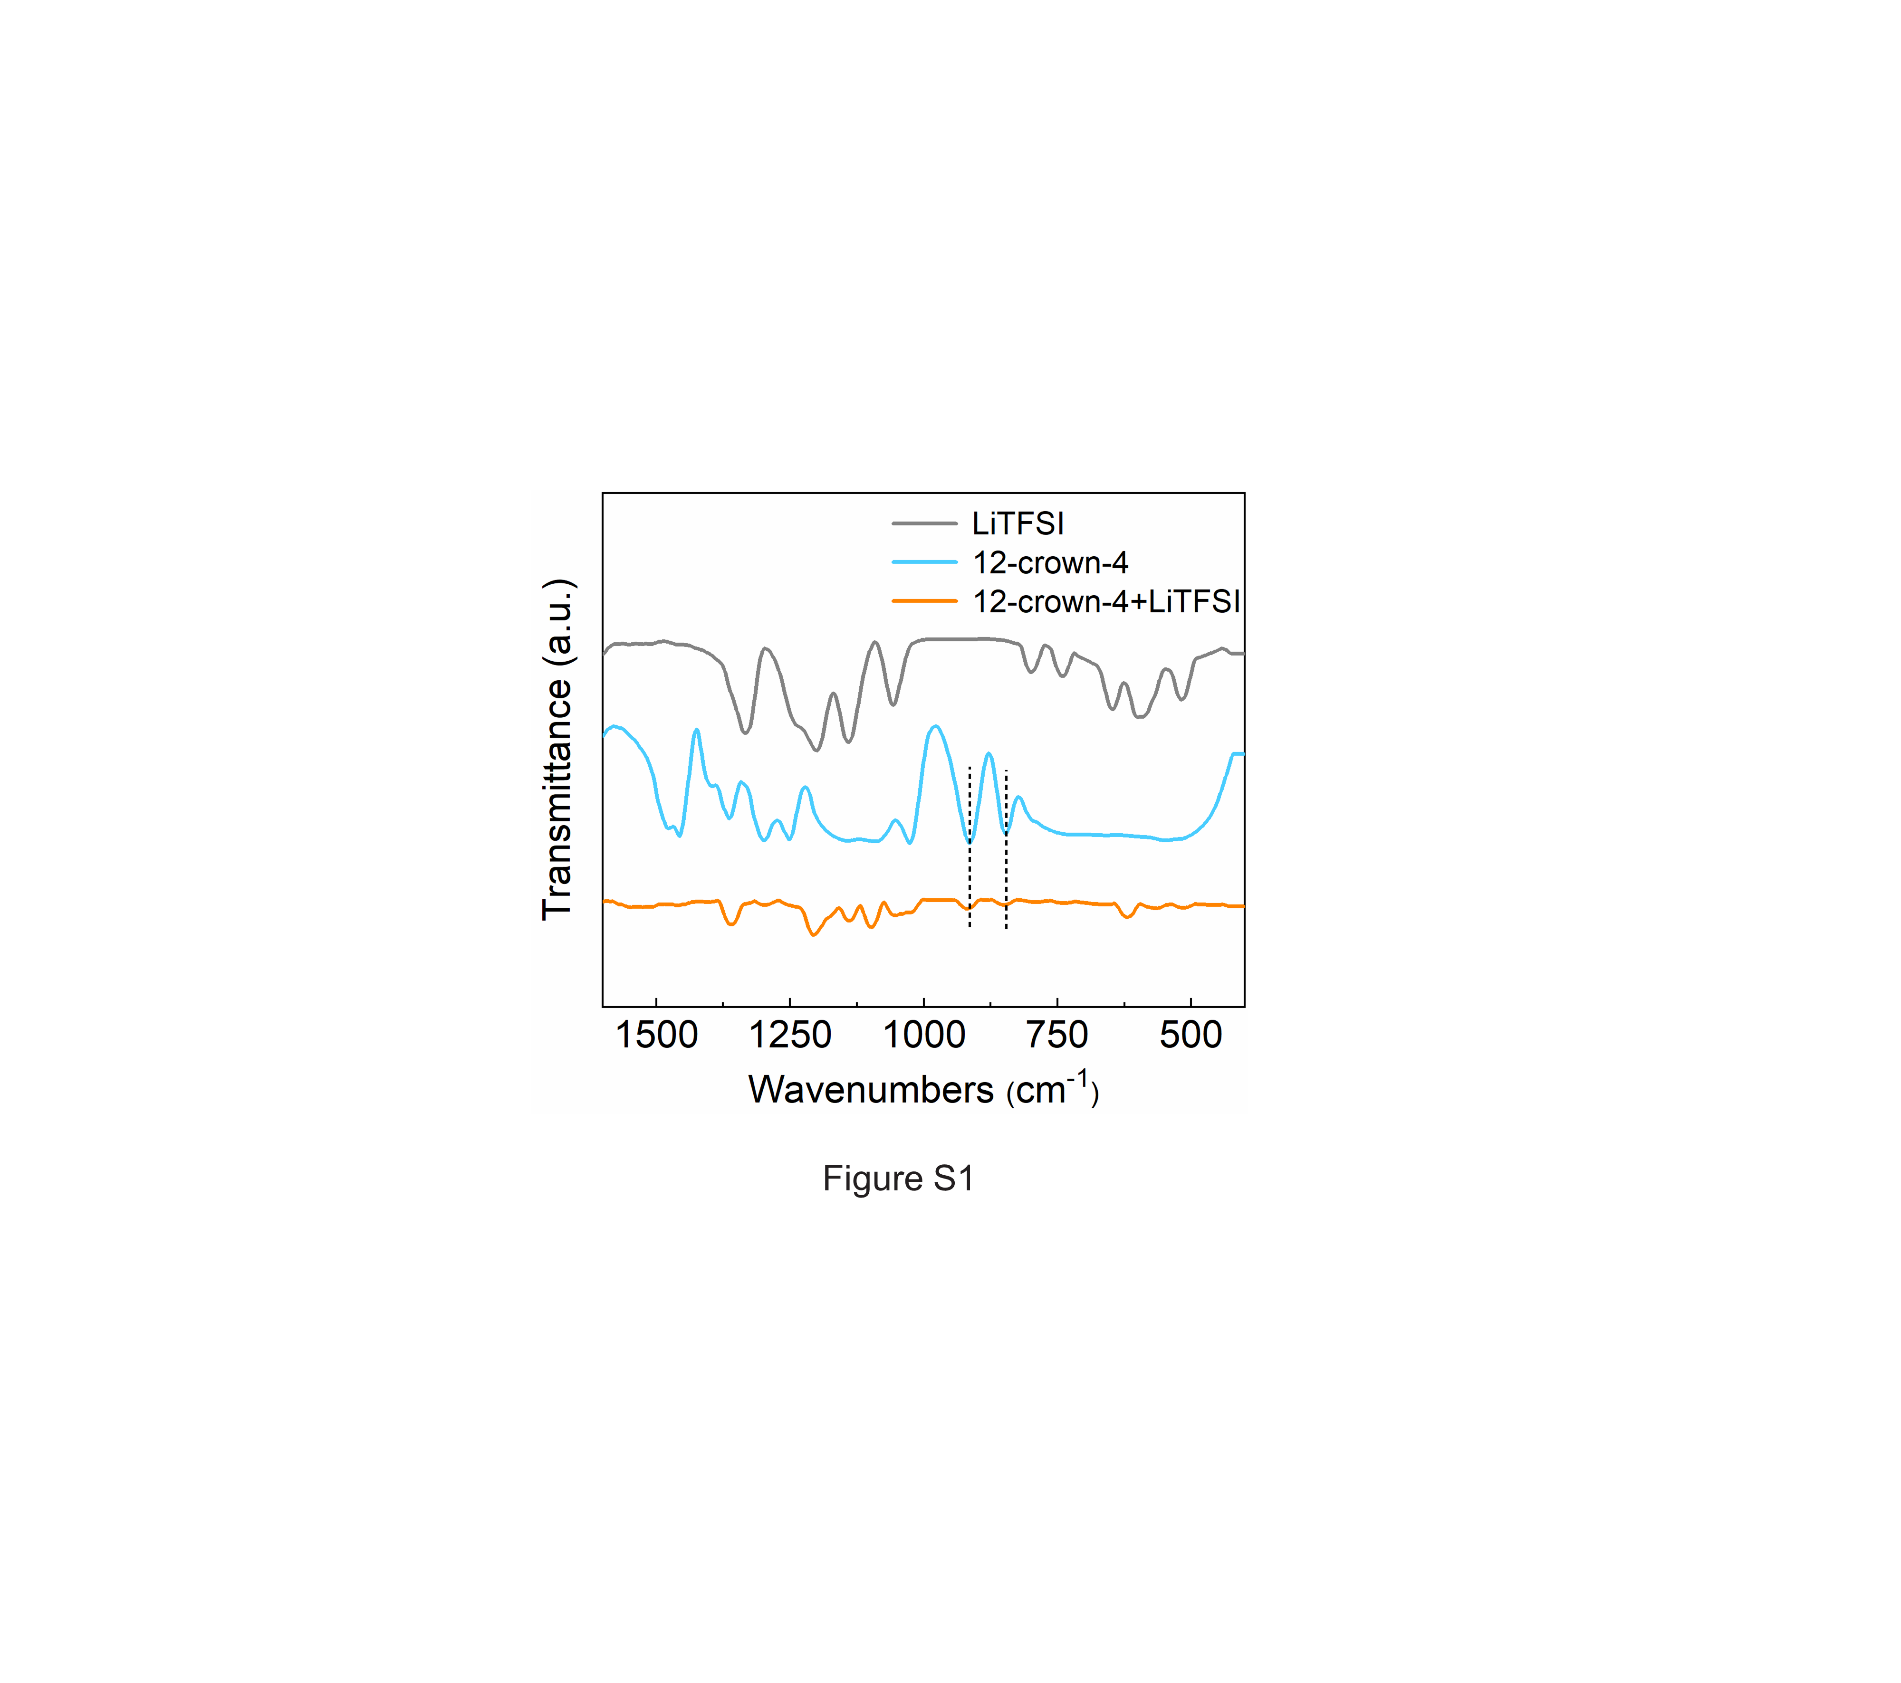


**Supplementary Figure 1.** FTIR spectra of LiTFSI, 12-crown-4, and the mixture of 12-crown-4/LiTFSI.


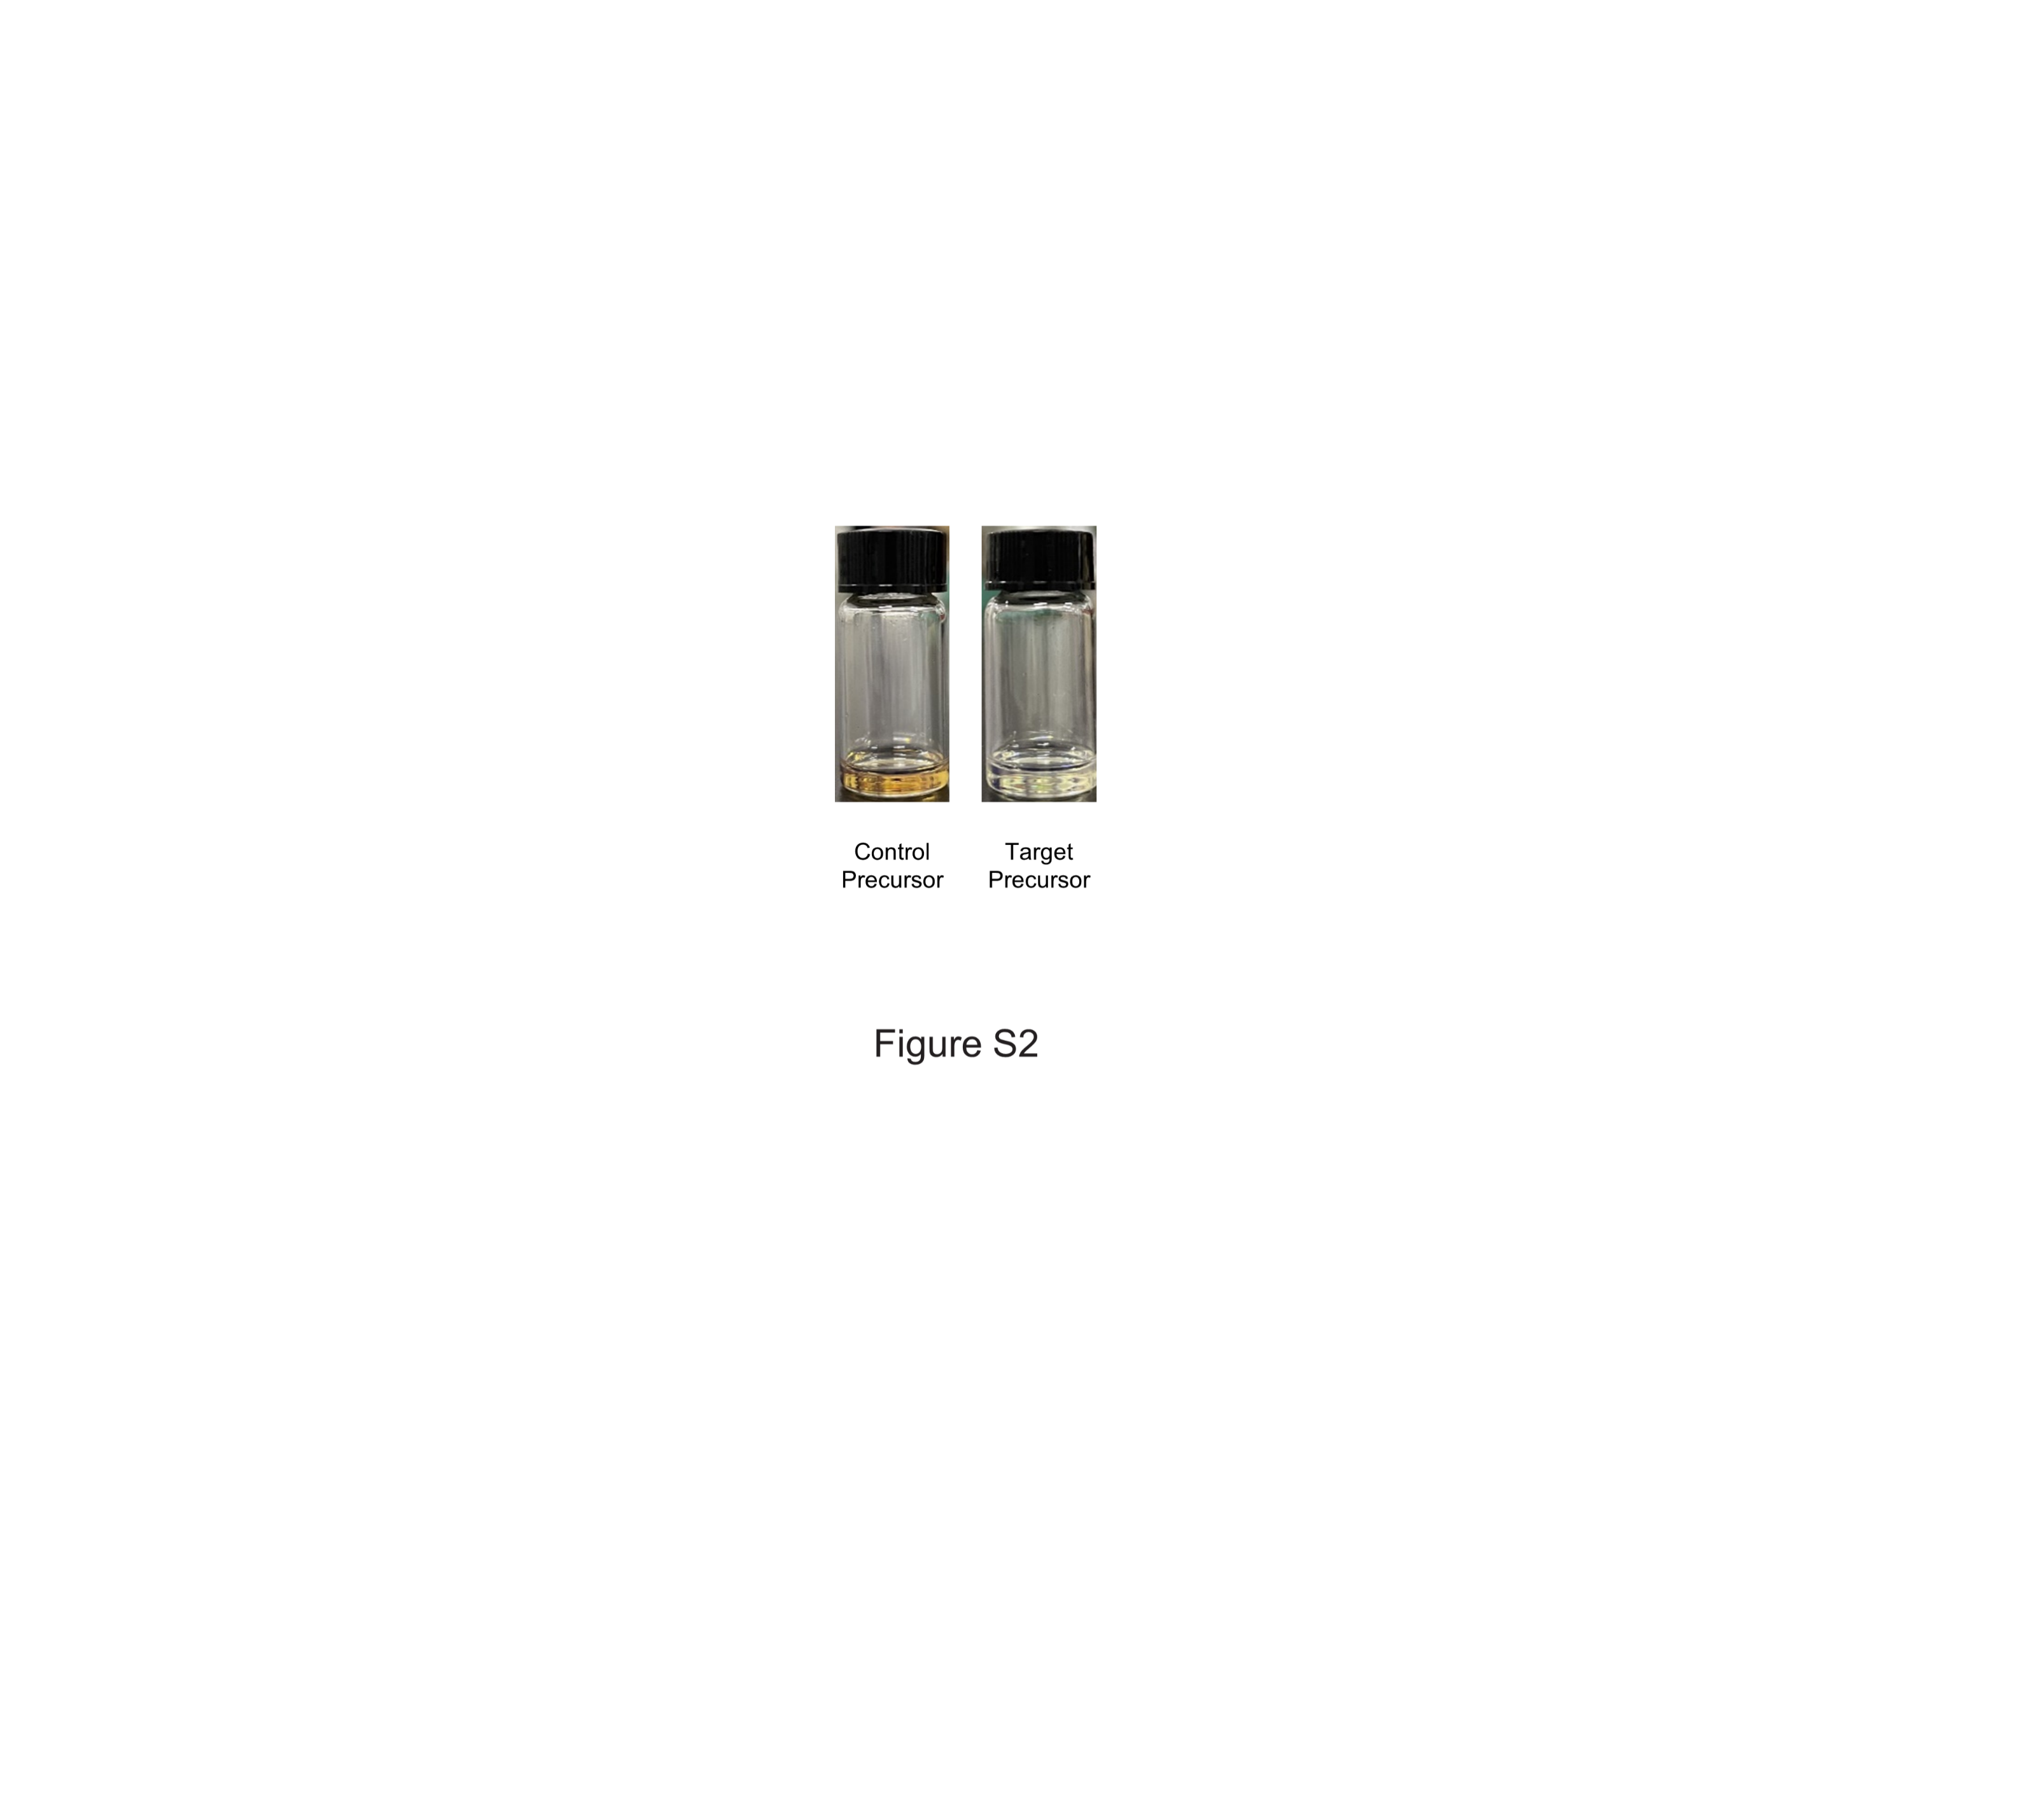


**Supplementary Figure 2.** Optical images of control (left) and target (right) precursor solution.

**
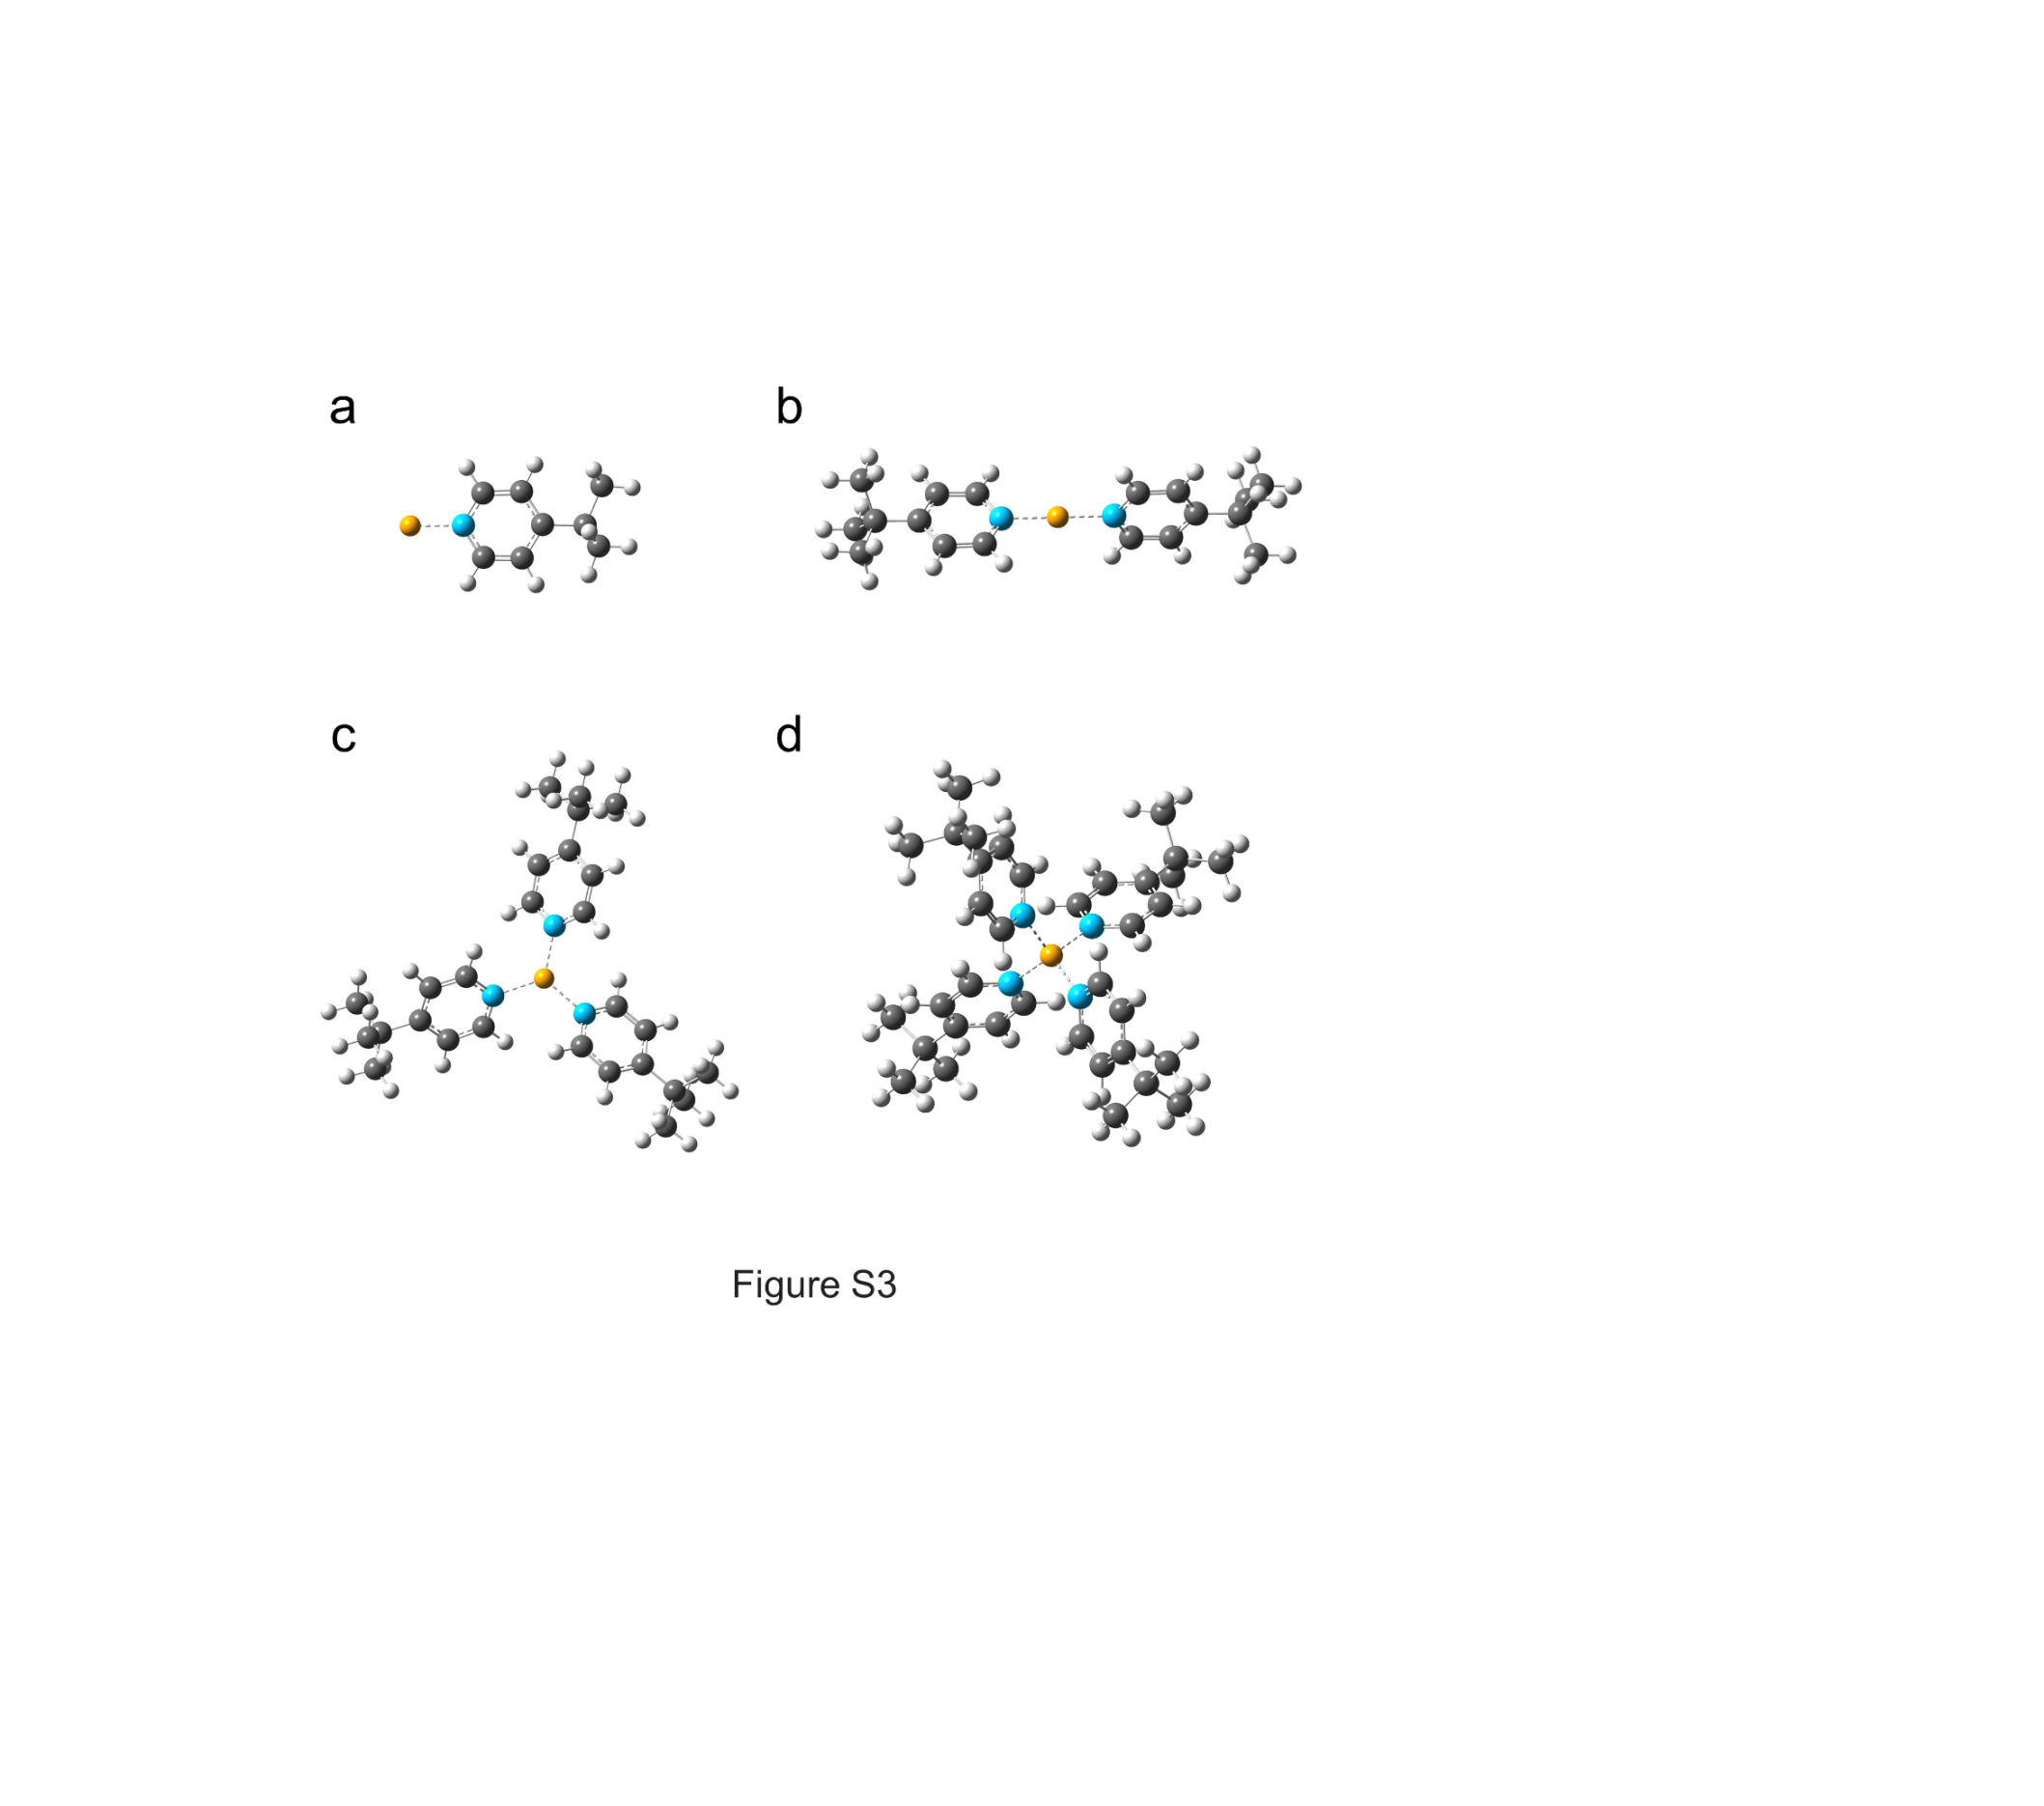
**

**Supplementary Figure 3.** Configurations for Li+ ion and TBP molecule interaction. **a** Li+/1TBP, **b** Li+/2TBP, **c** Li+/3TBP, **d** Li+/4TBP. The solvation energy for each configuration is -2.30 eV, -4.08 eV, -5.41 eV, and -6.41 eV, respectively.


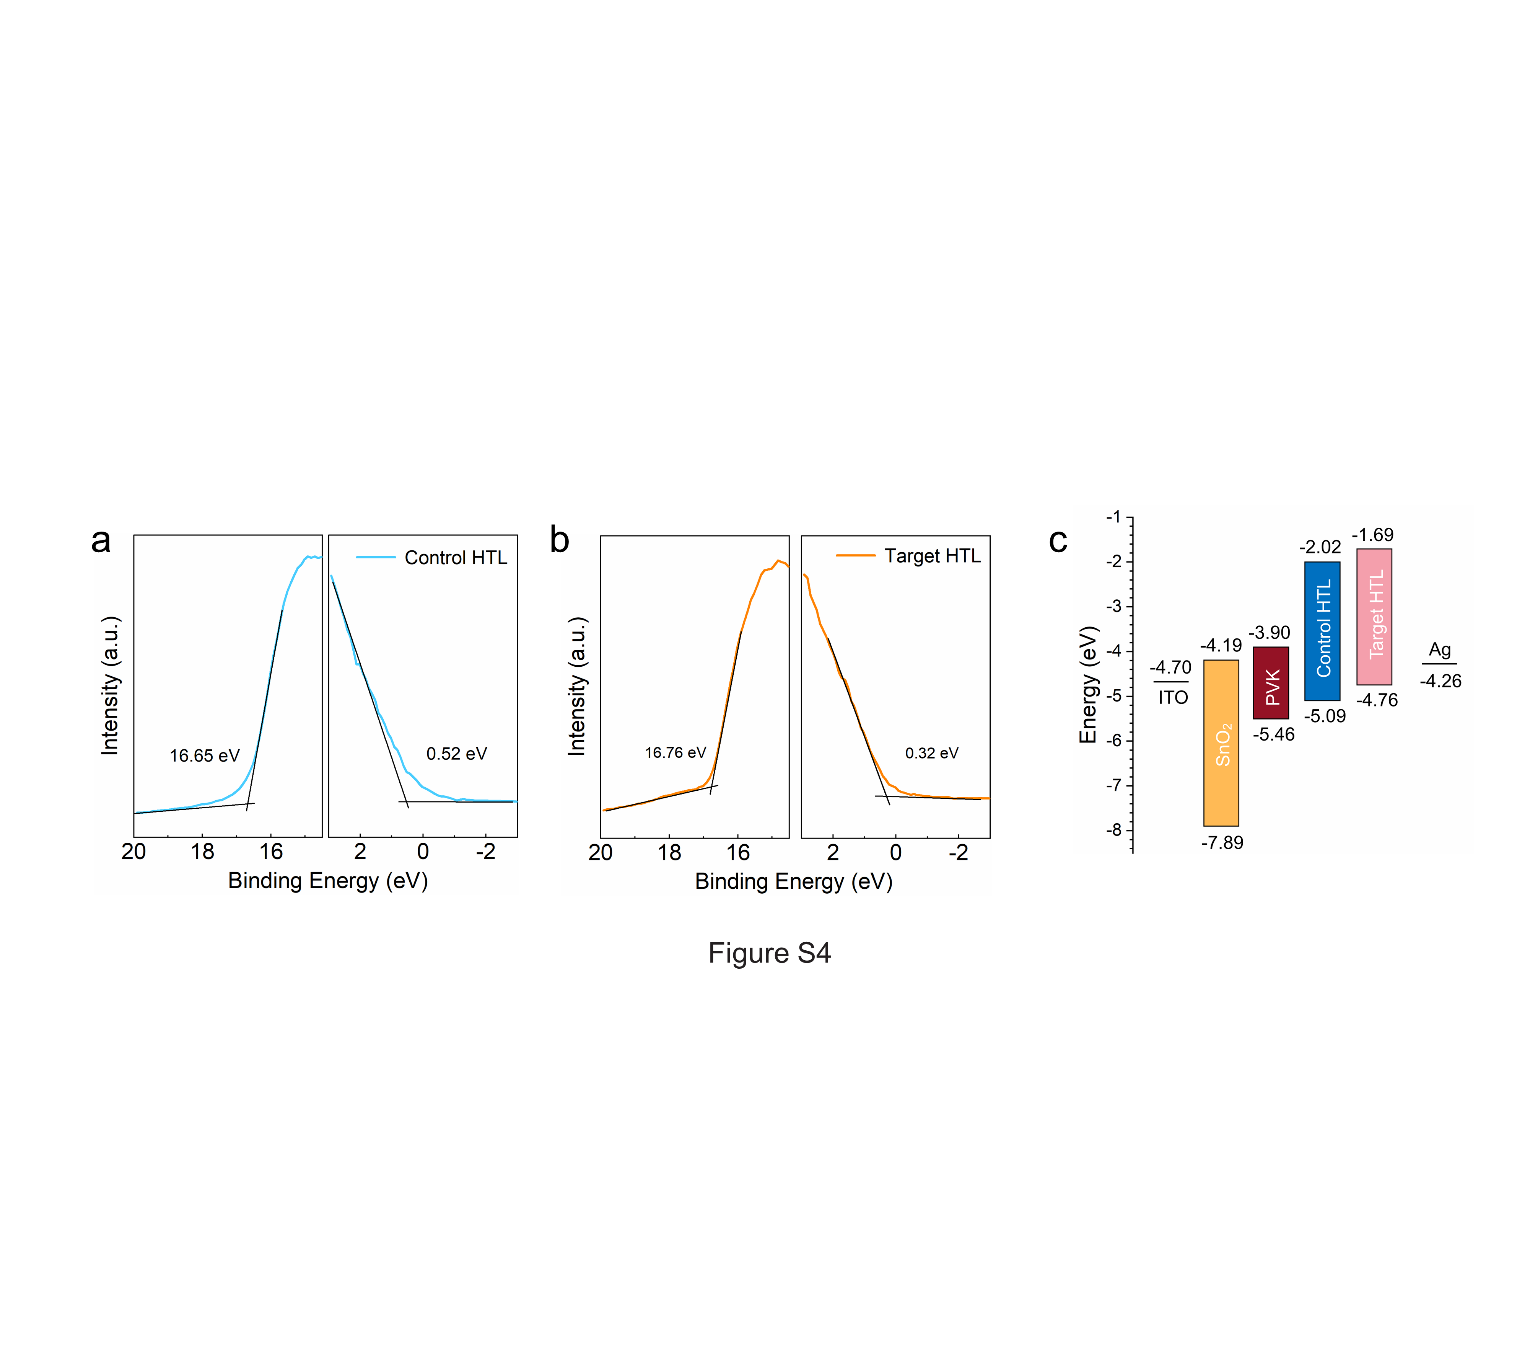


**Supplementary Figure 4.** The UPS spectra of **a** control and **b** target HTL as well as **c** the energy band alignment of the PSCs.


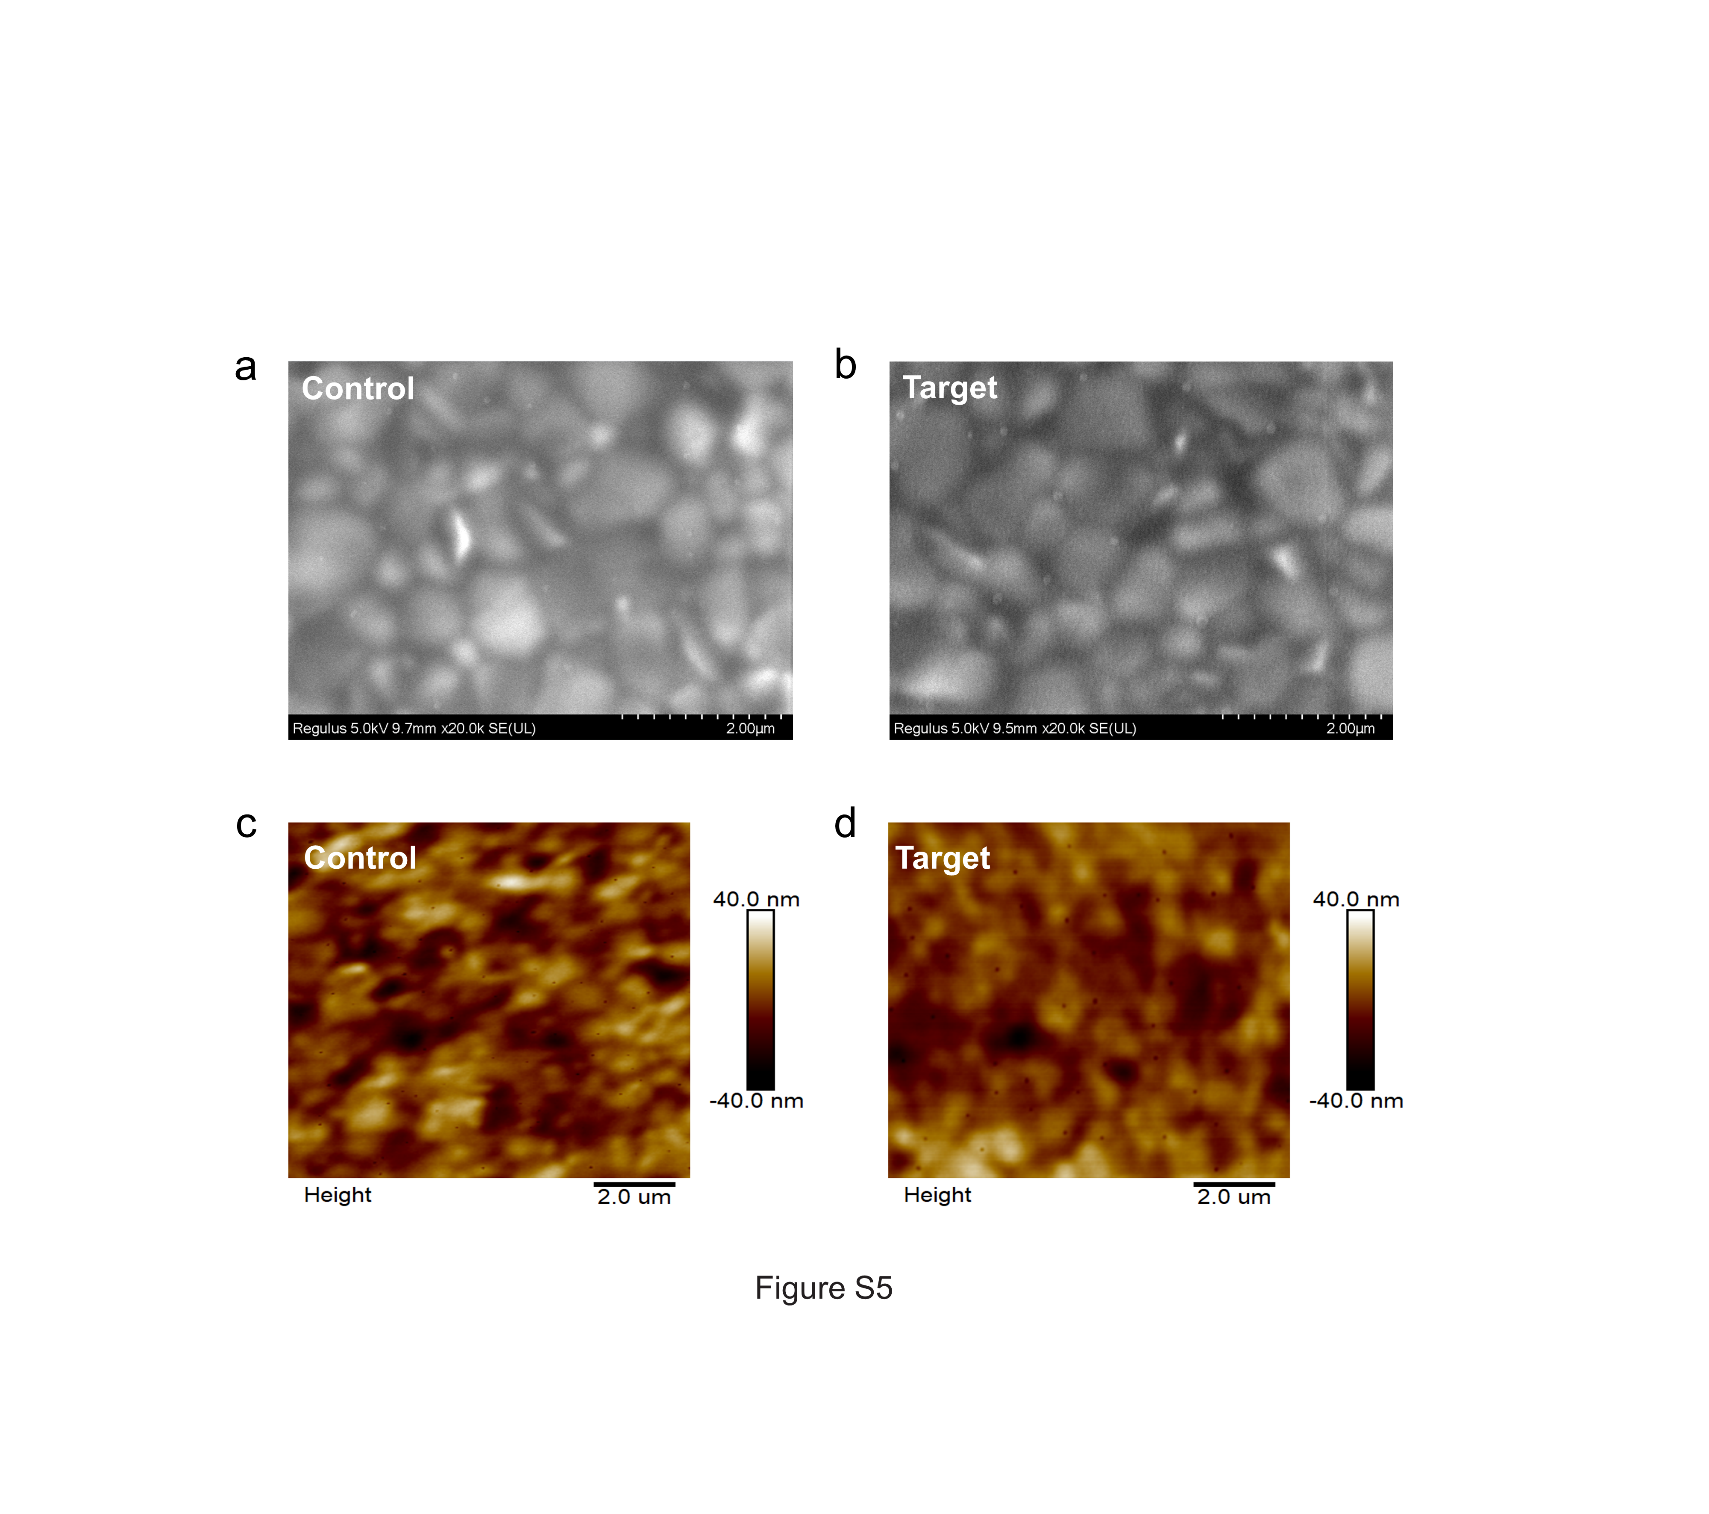


**Supplementary Figure 5.** SEM and AFM images of **a** **c** control and **b** **d** target HTL on the perovskite film.


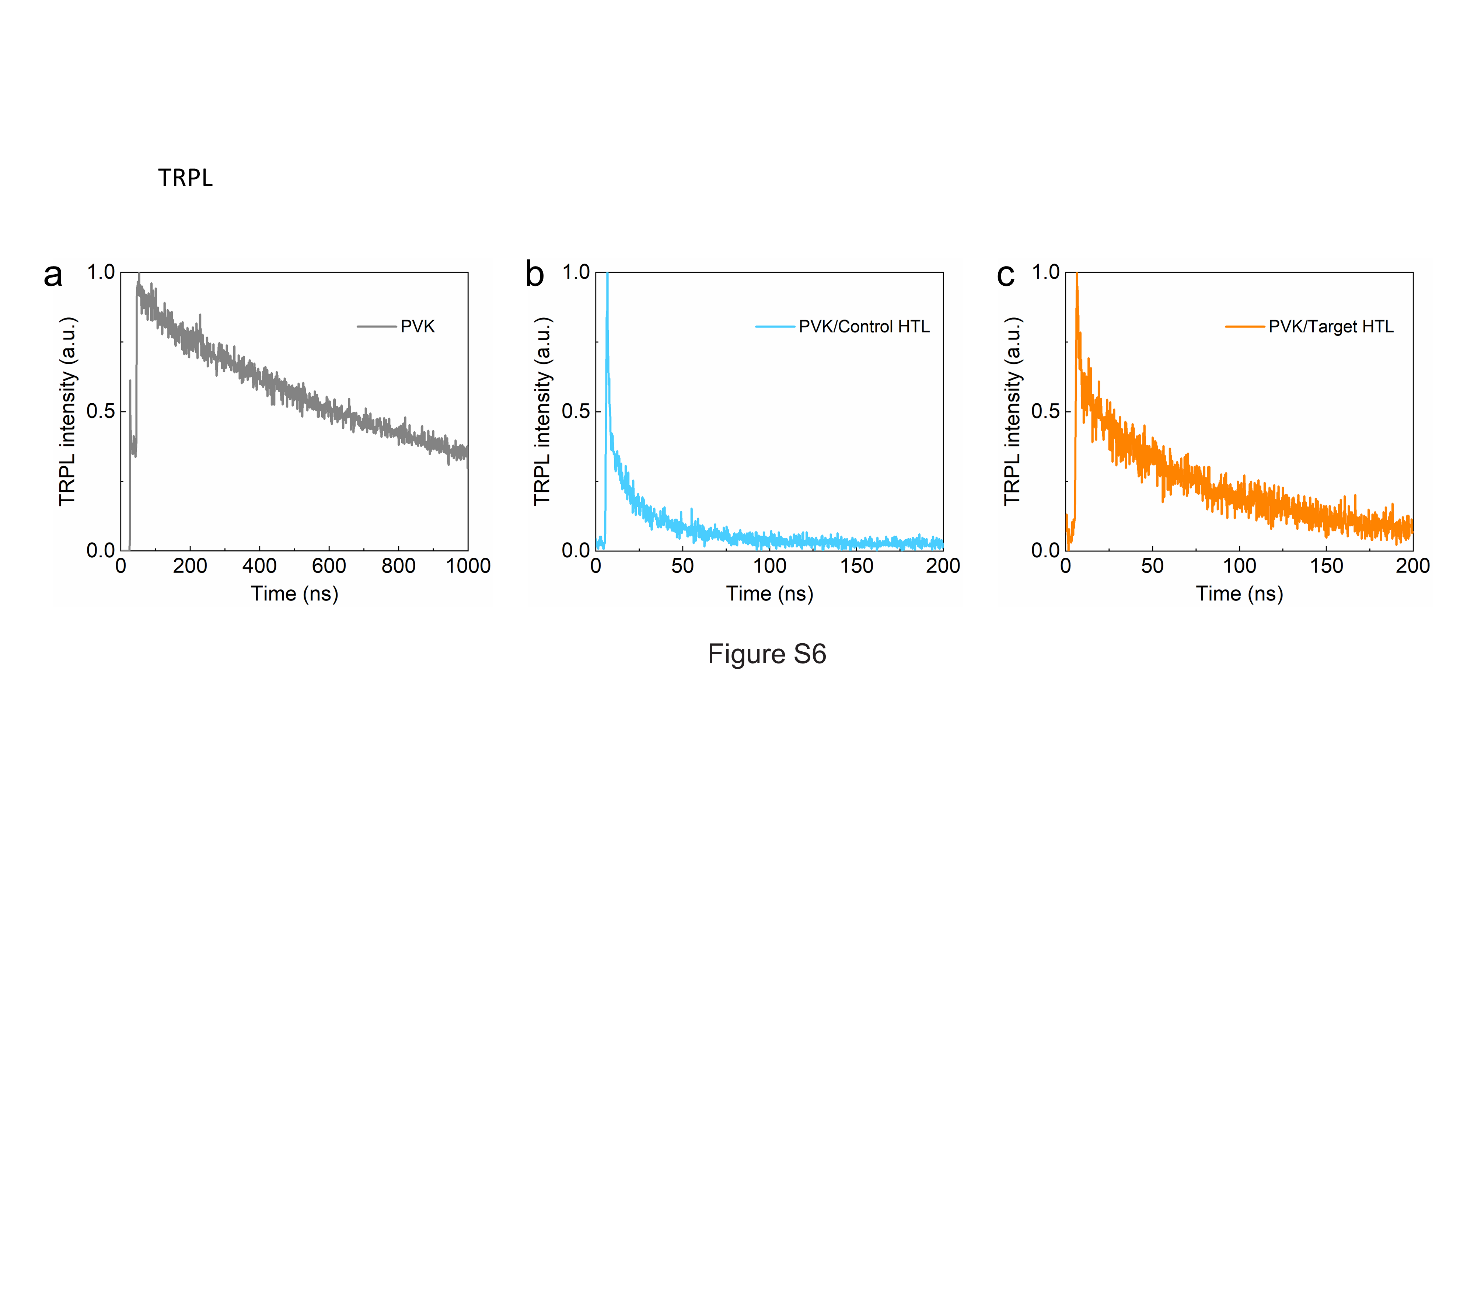


**Supplementary Figure 6.** TRPL spectra of **a** perovskite and perovskite with **b** control and **c** target HTL.


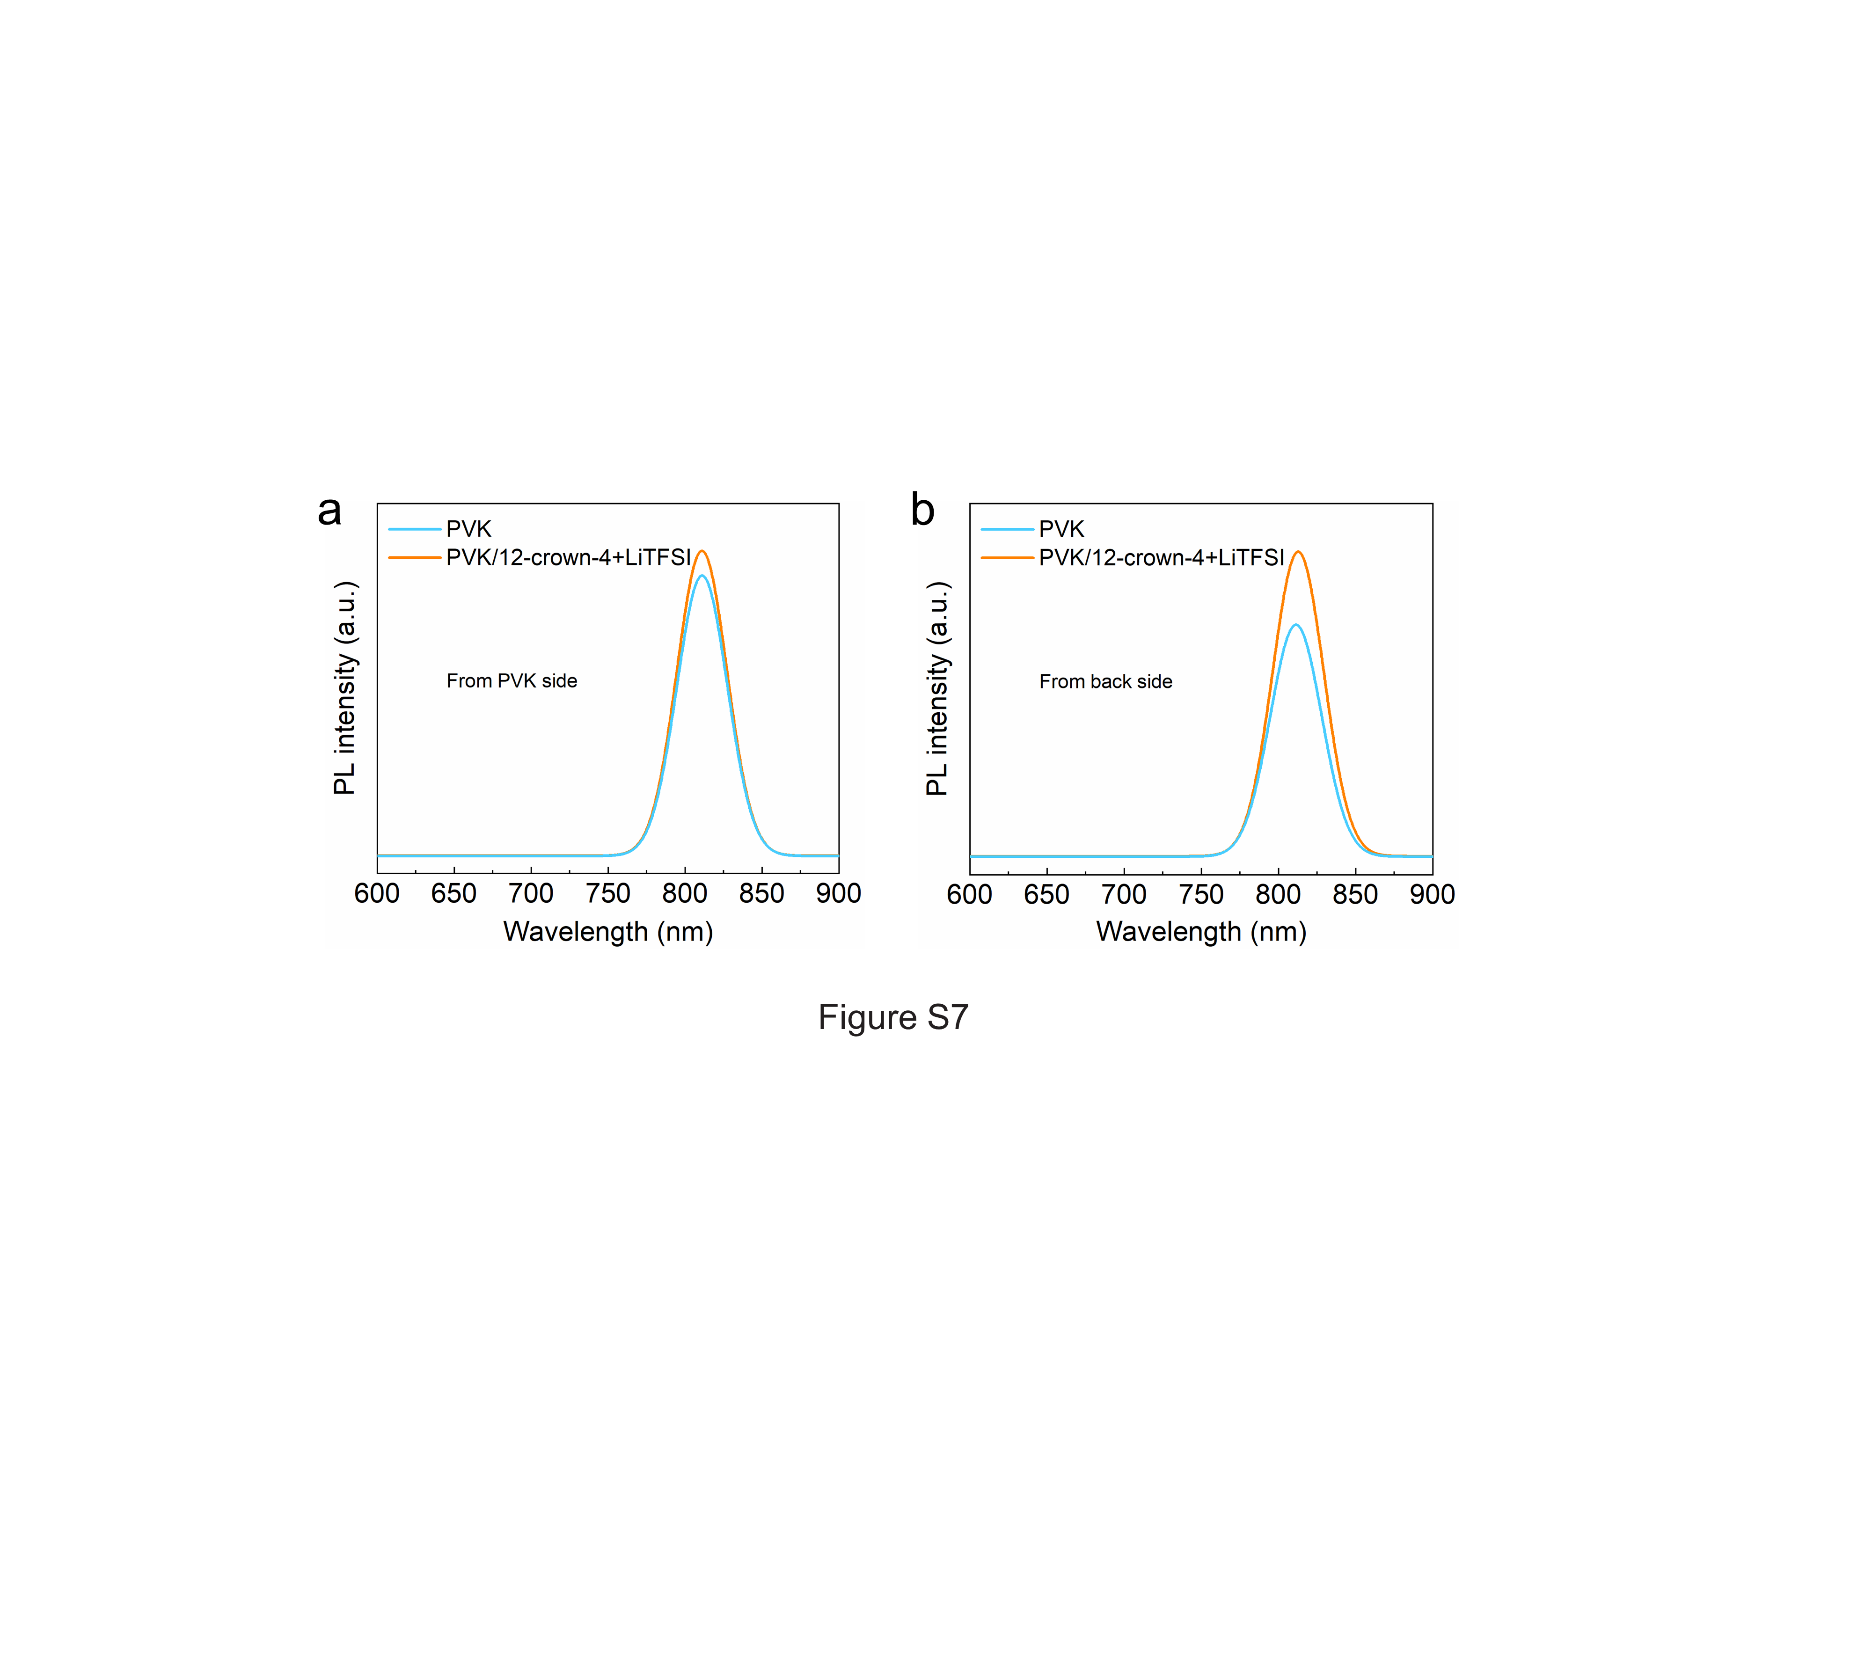


**Supplementary Figure 7.** Steady-state PL of the perovskite film without and with surface treatment using 12-crown-4/LiTFSI. The light beam was incident from **a** the perovskite surface side or **b** the glass back side.


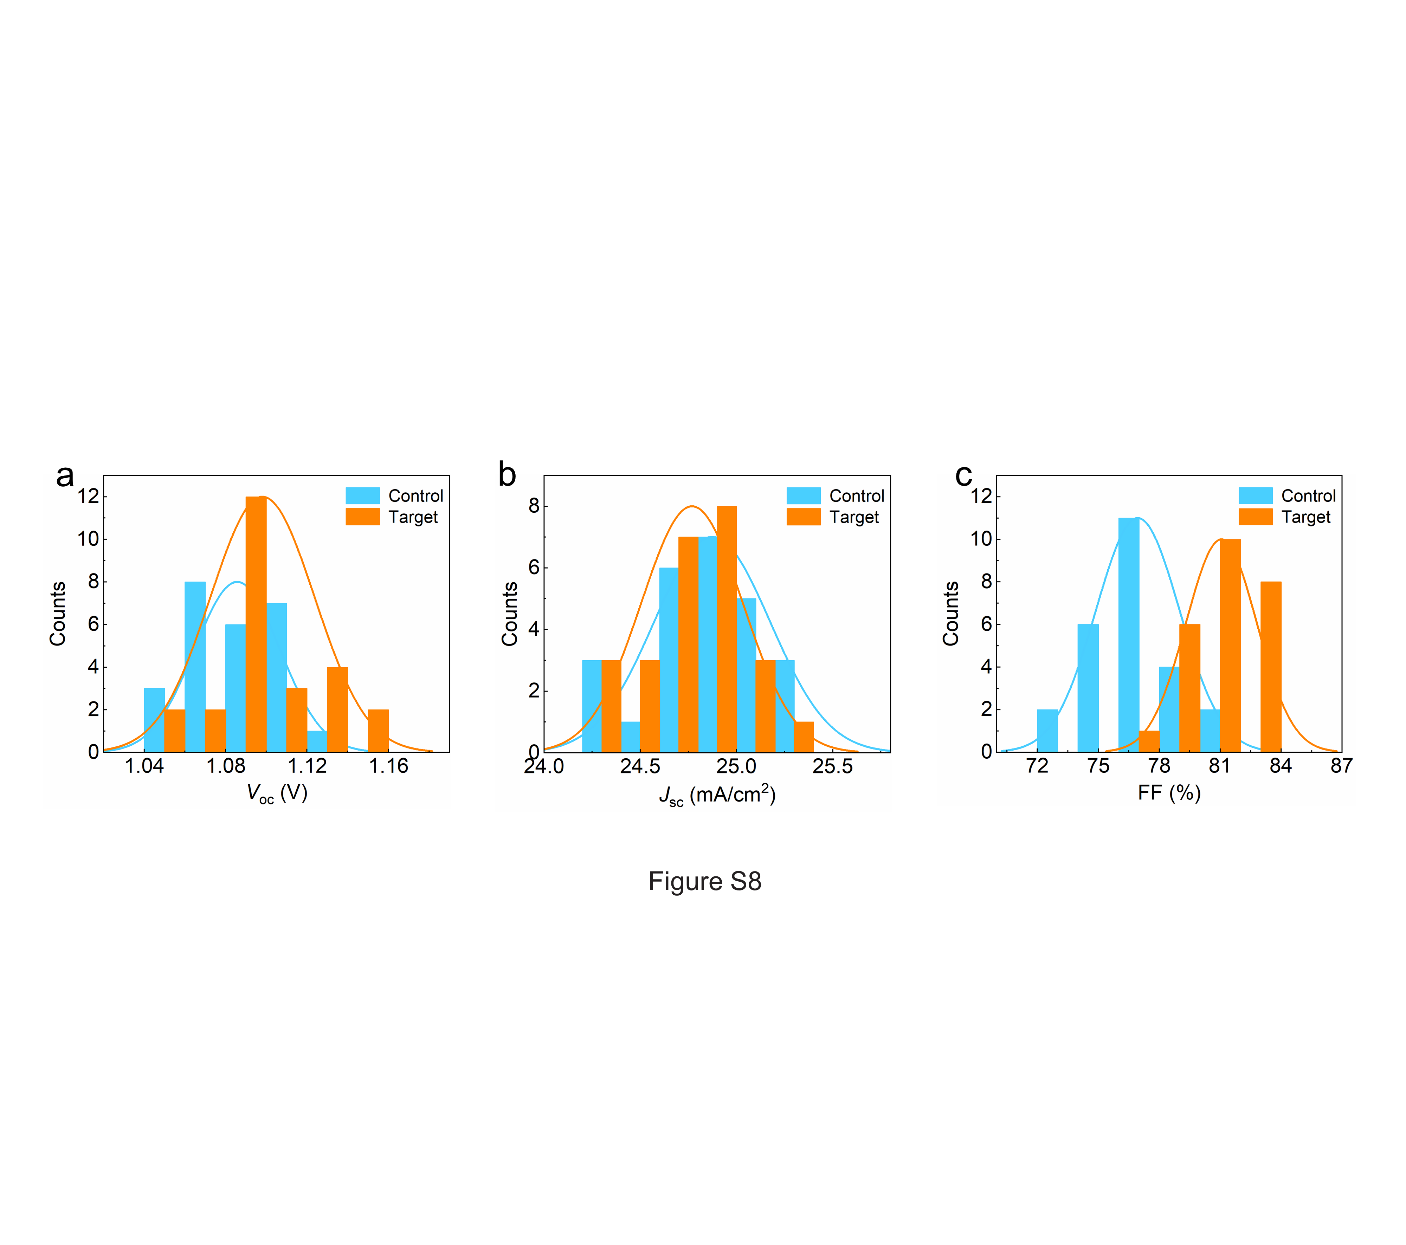


**Supplementary Figure 8.** Statistic distribution of photovoltaic parameters of control and target PSCs. **a** *V*oc, **b** *J*sc, **c** FF.


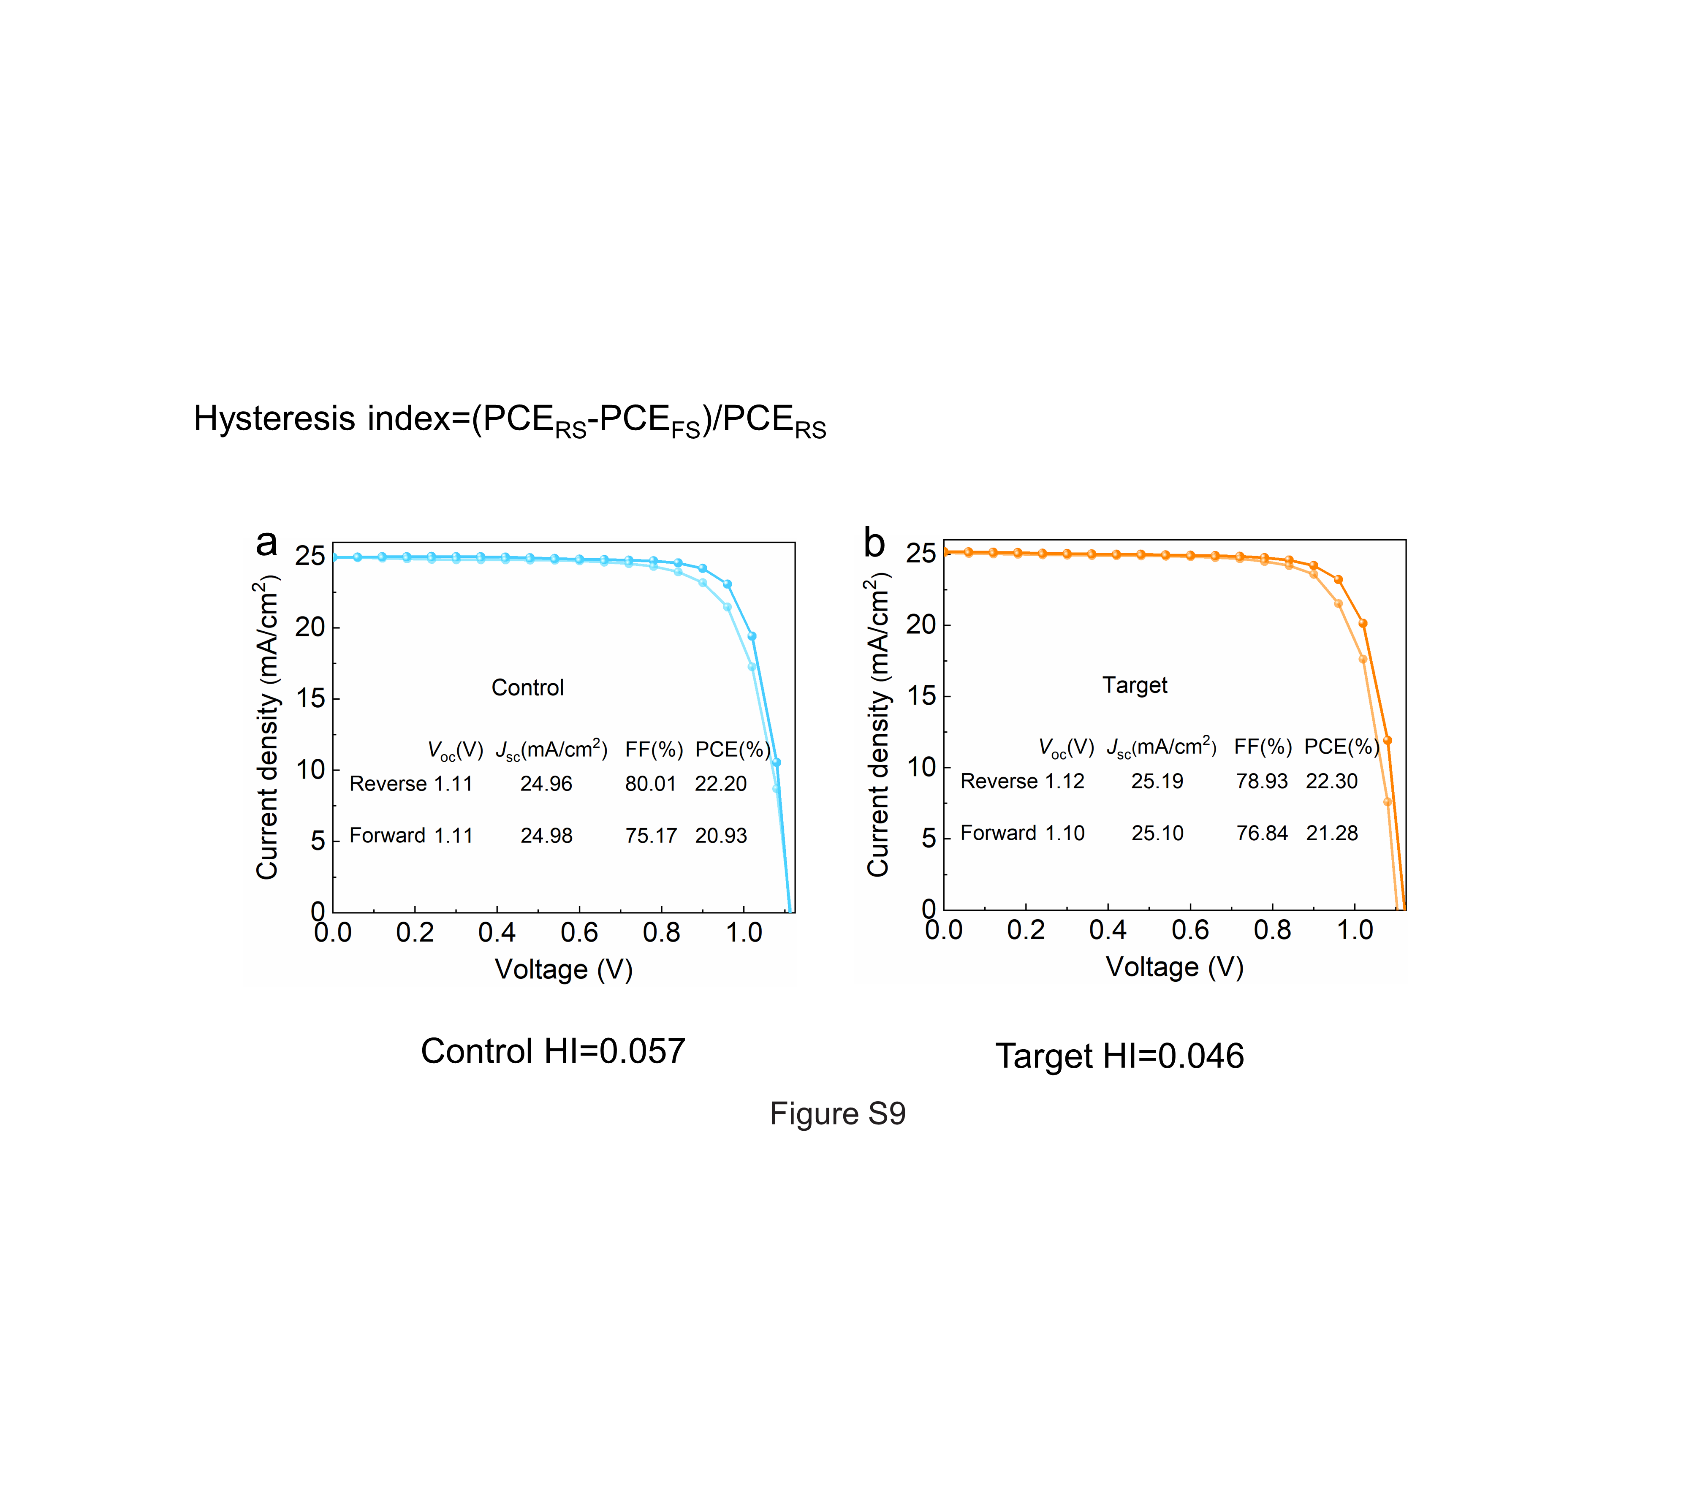


**Supplementary Figure 9.** Hysteresis behavior of **a** control and **b** target PSCs.


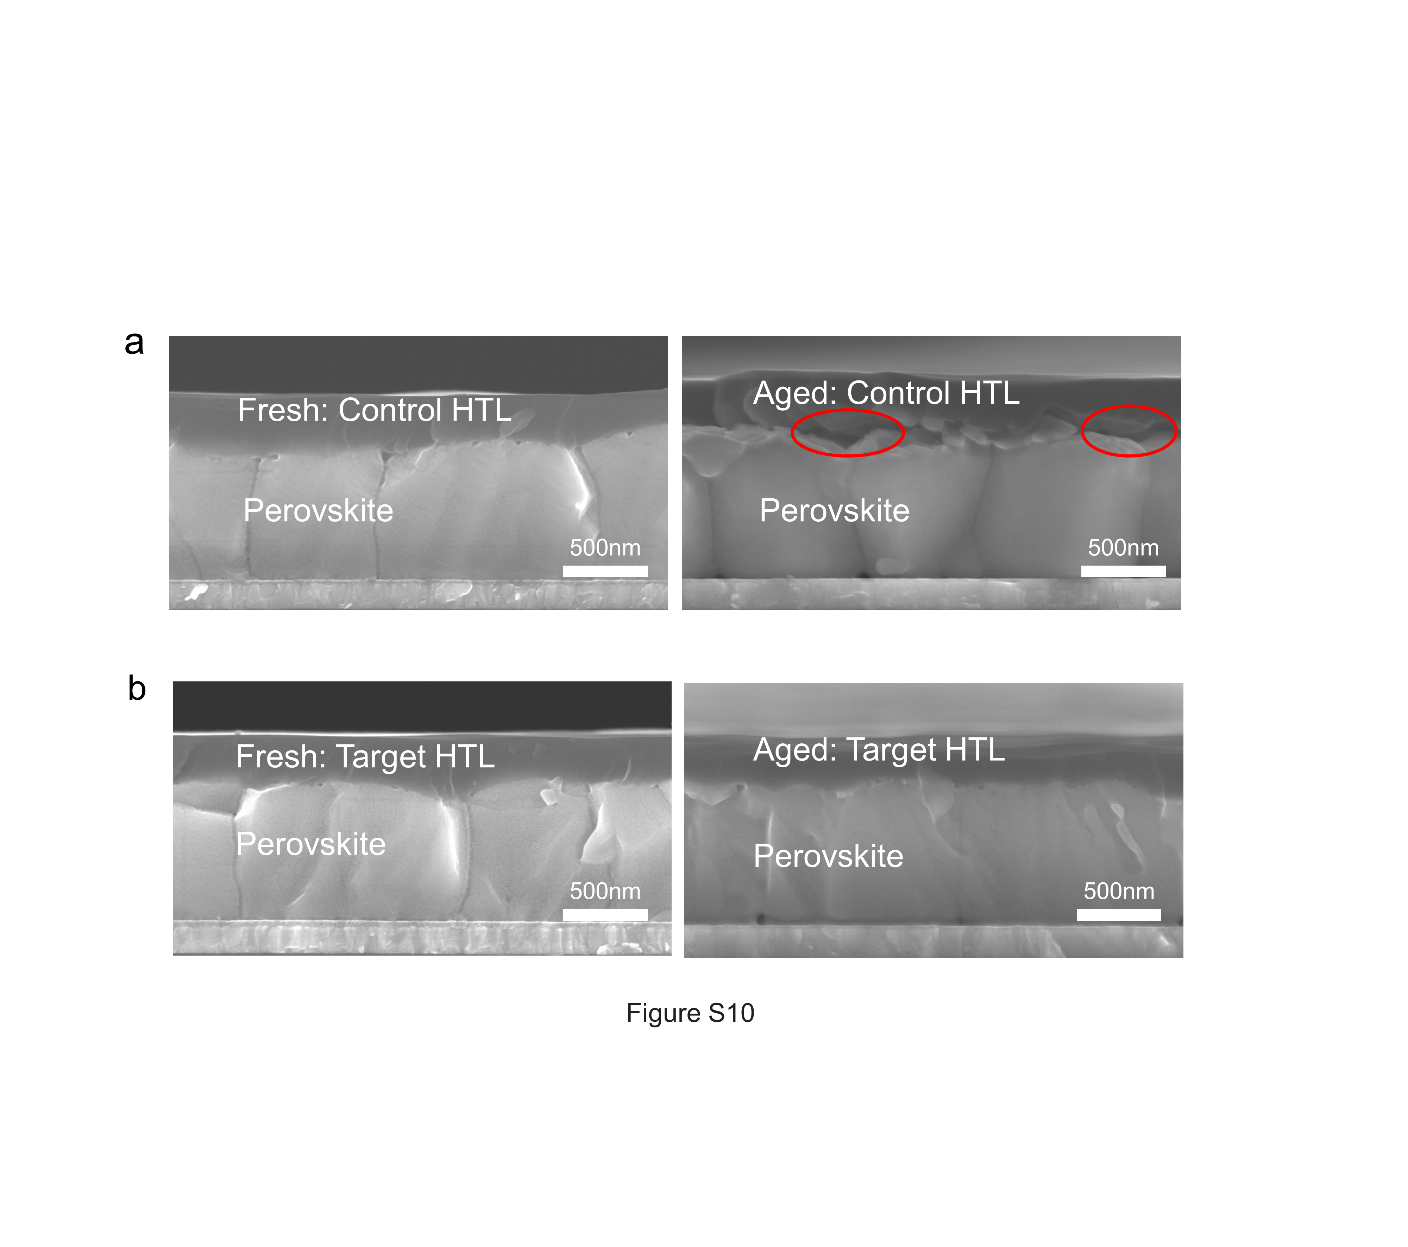


**Supplementary Figure 10.** Cross-section SEM images of control and target PSCs **a** before and **b** after aging for 168 h at a RH of 40%.


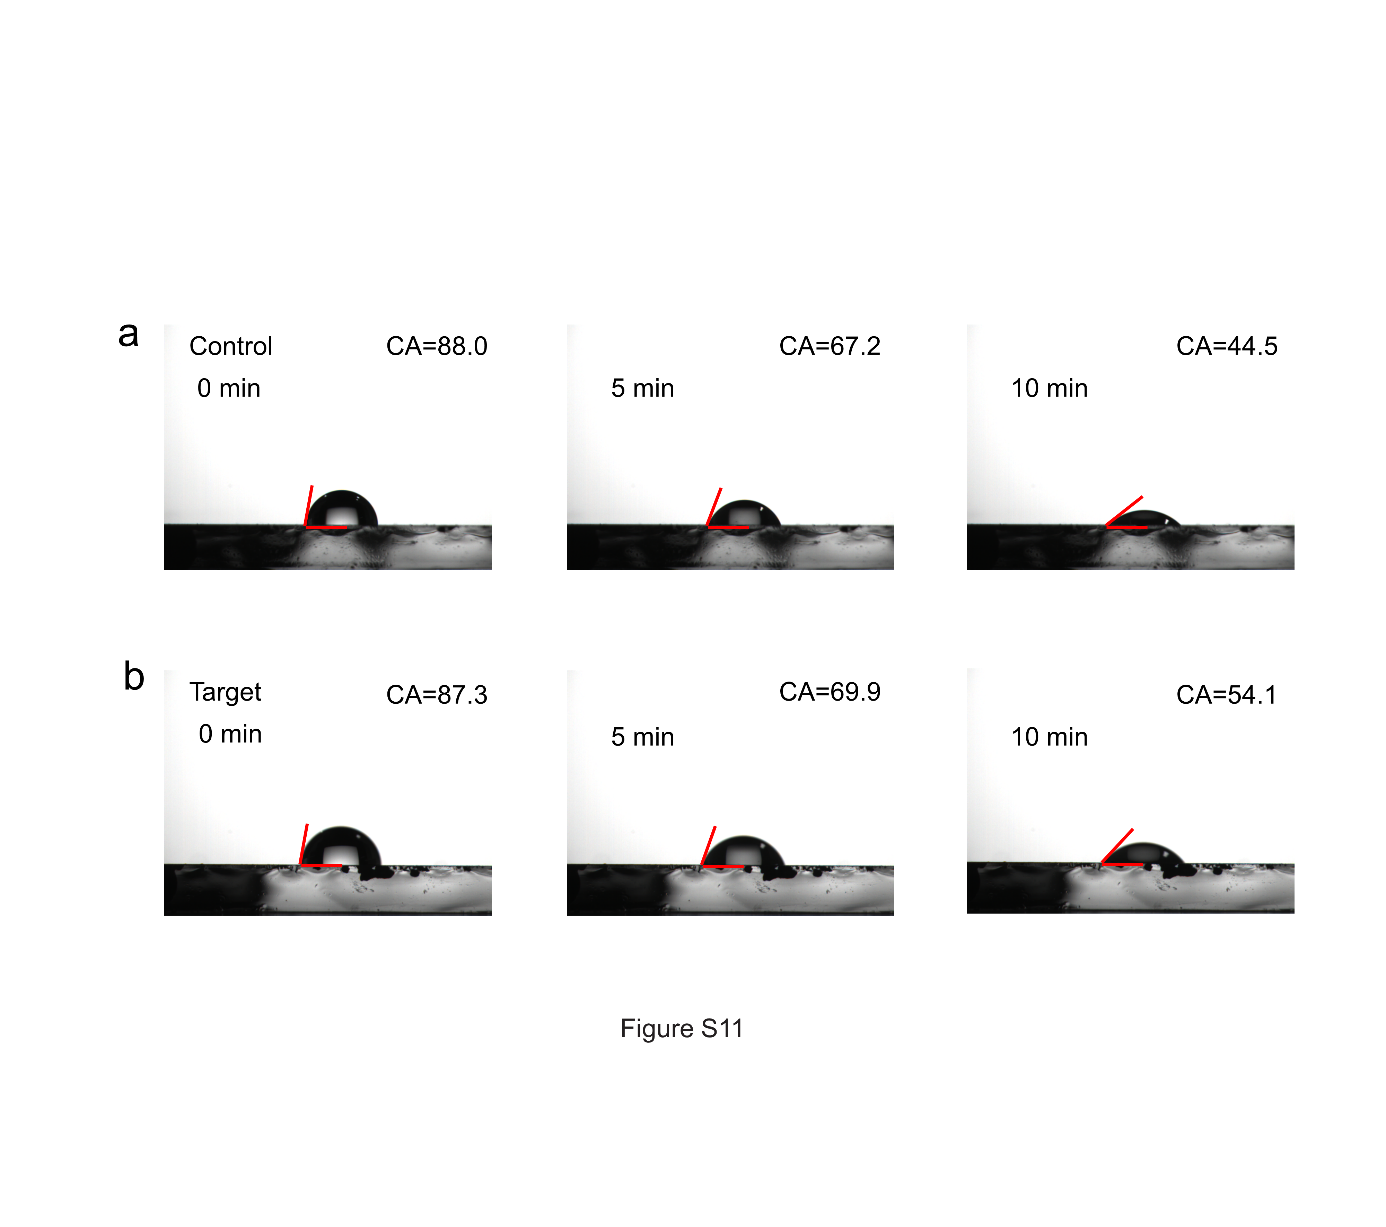


**Supplementary Figure 11.** Time dependant water contact angle of **a** control and **b** target HTL.


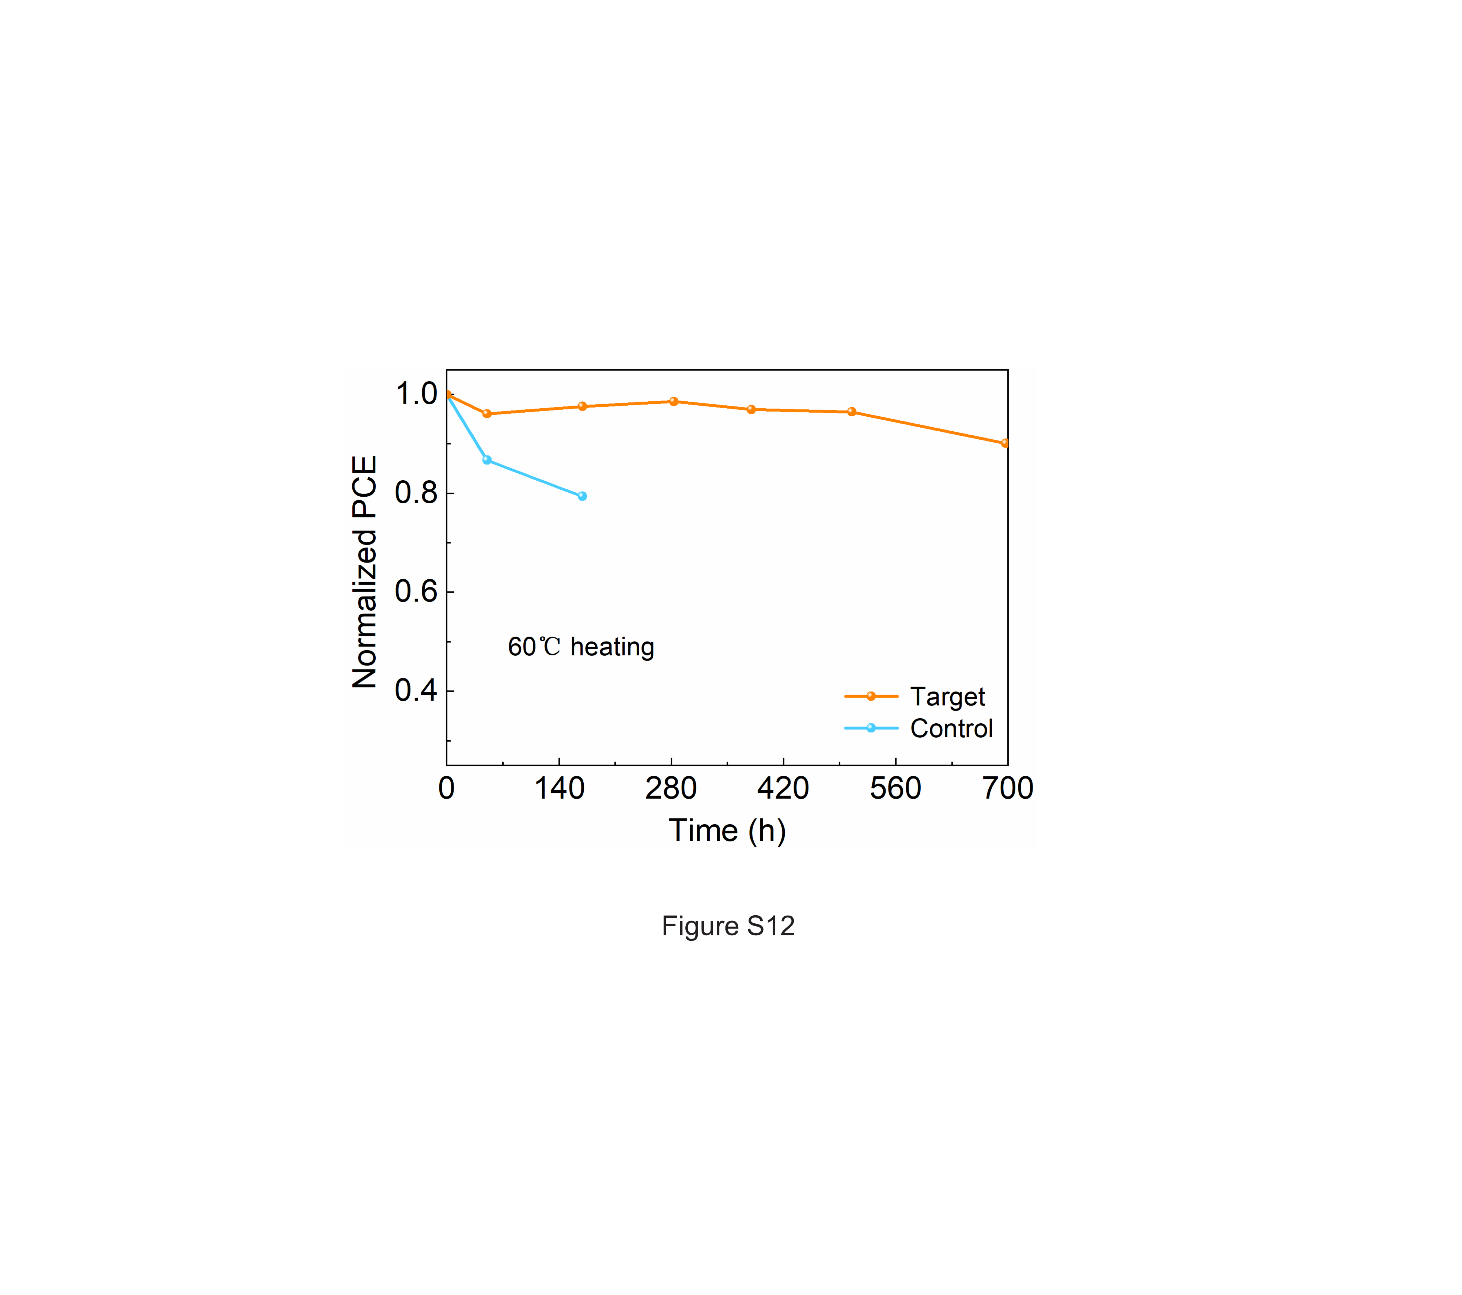


**Supplementary Figure 12.** Thermal stability of control and target PSCs aged in a glove box at 60 oC.


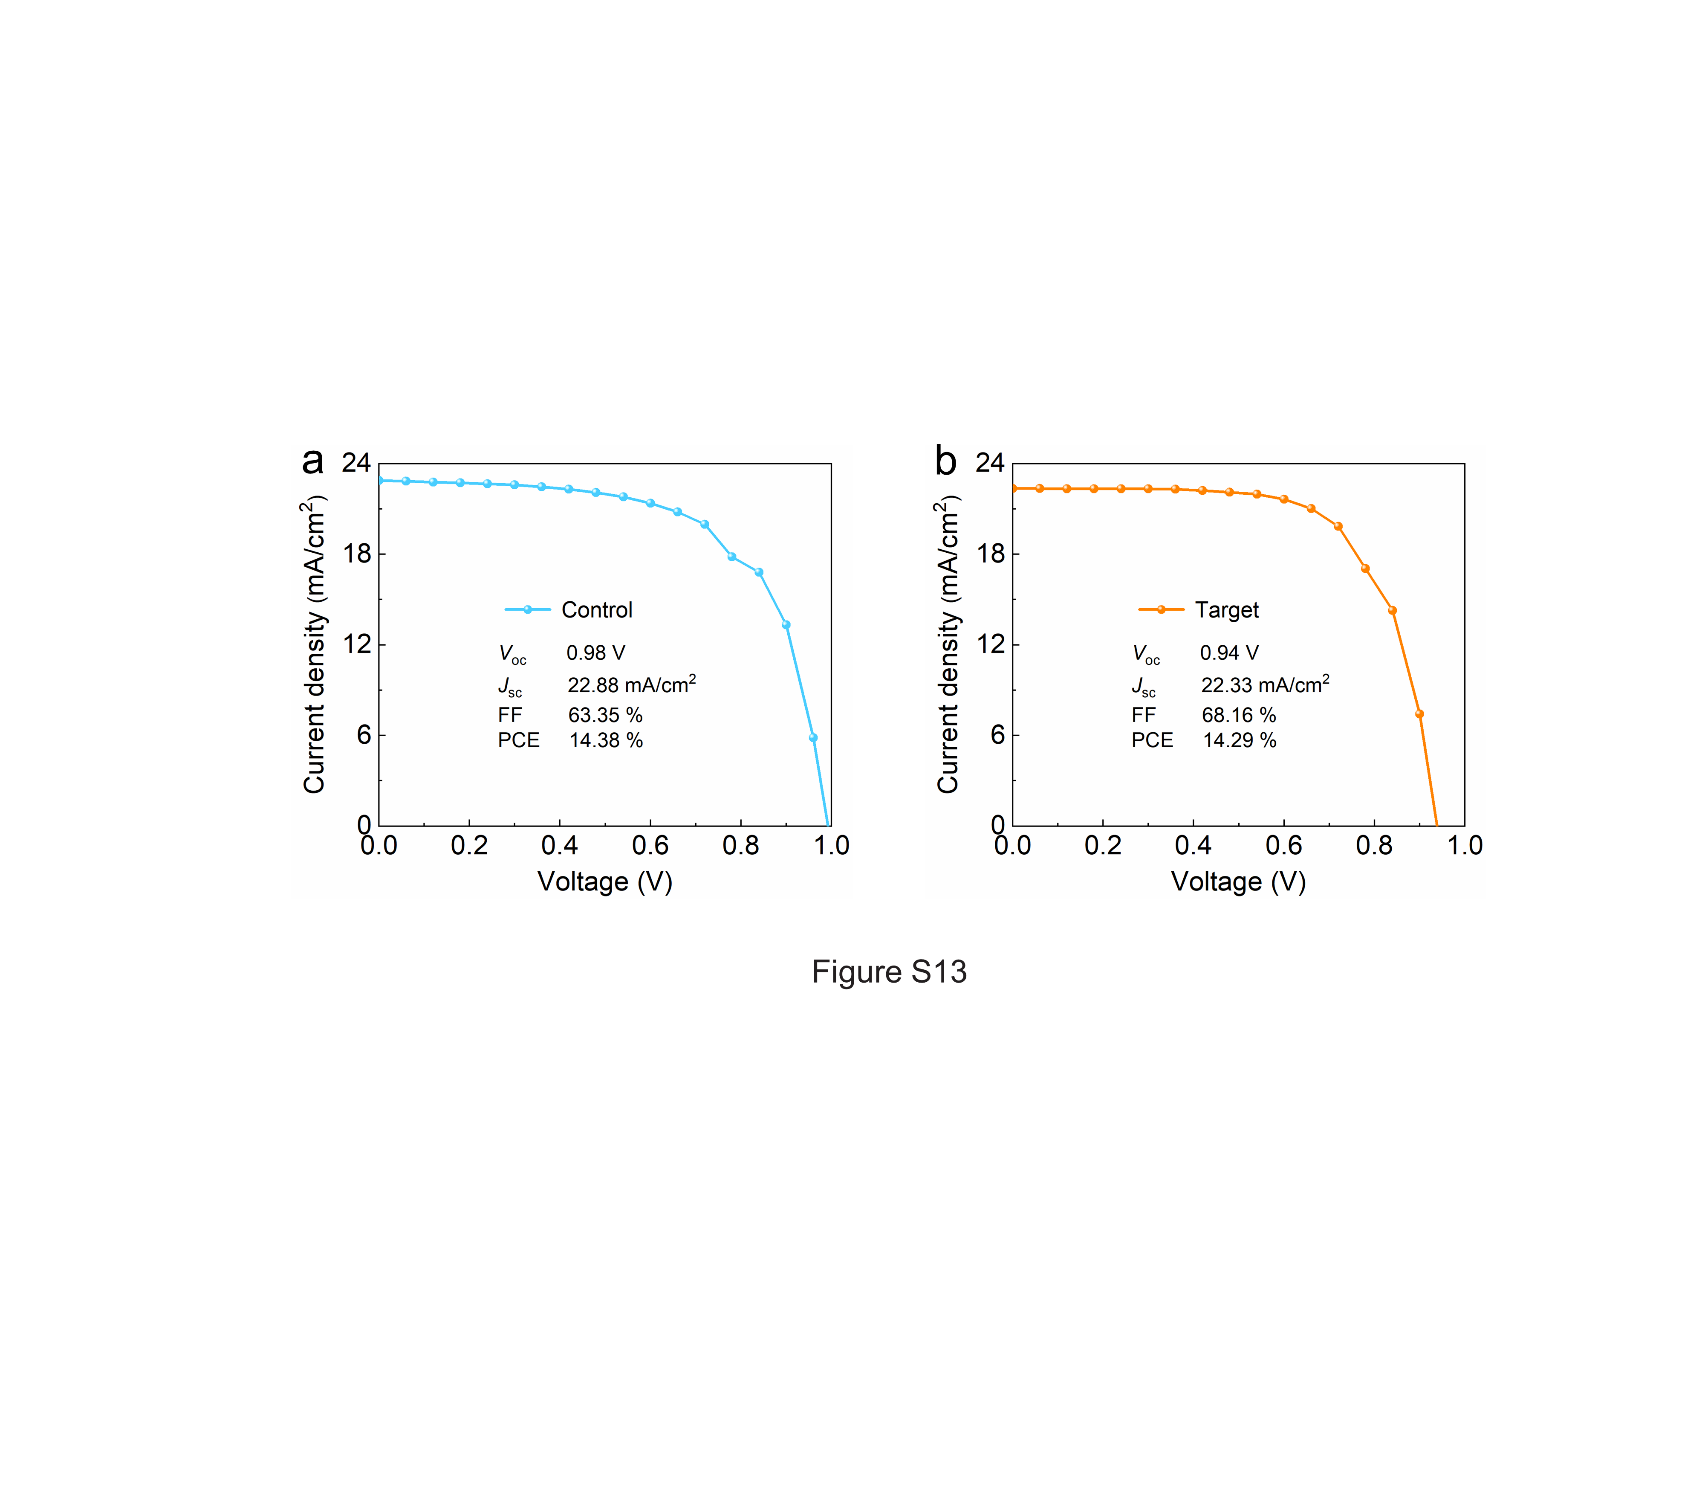


**Supplementary Figure 13.** *J-V* curves of PSCs based on **a** control and **b** target P3HT.


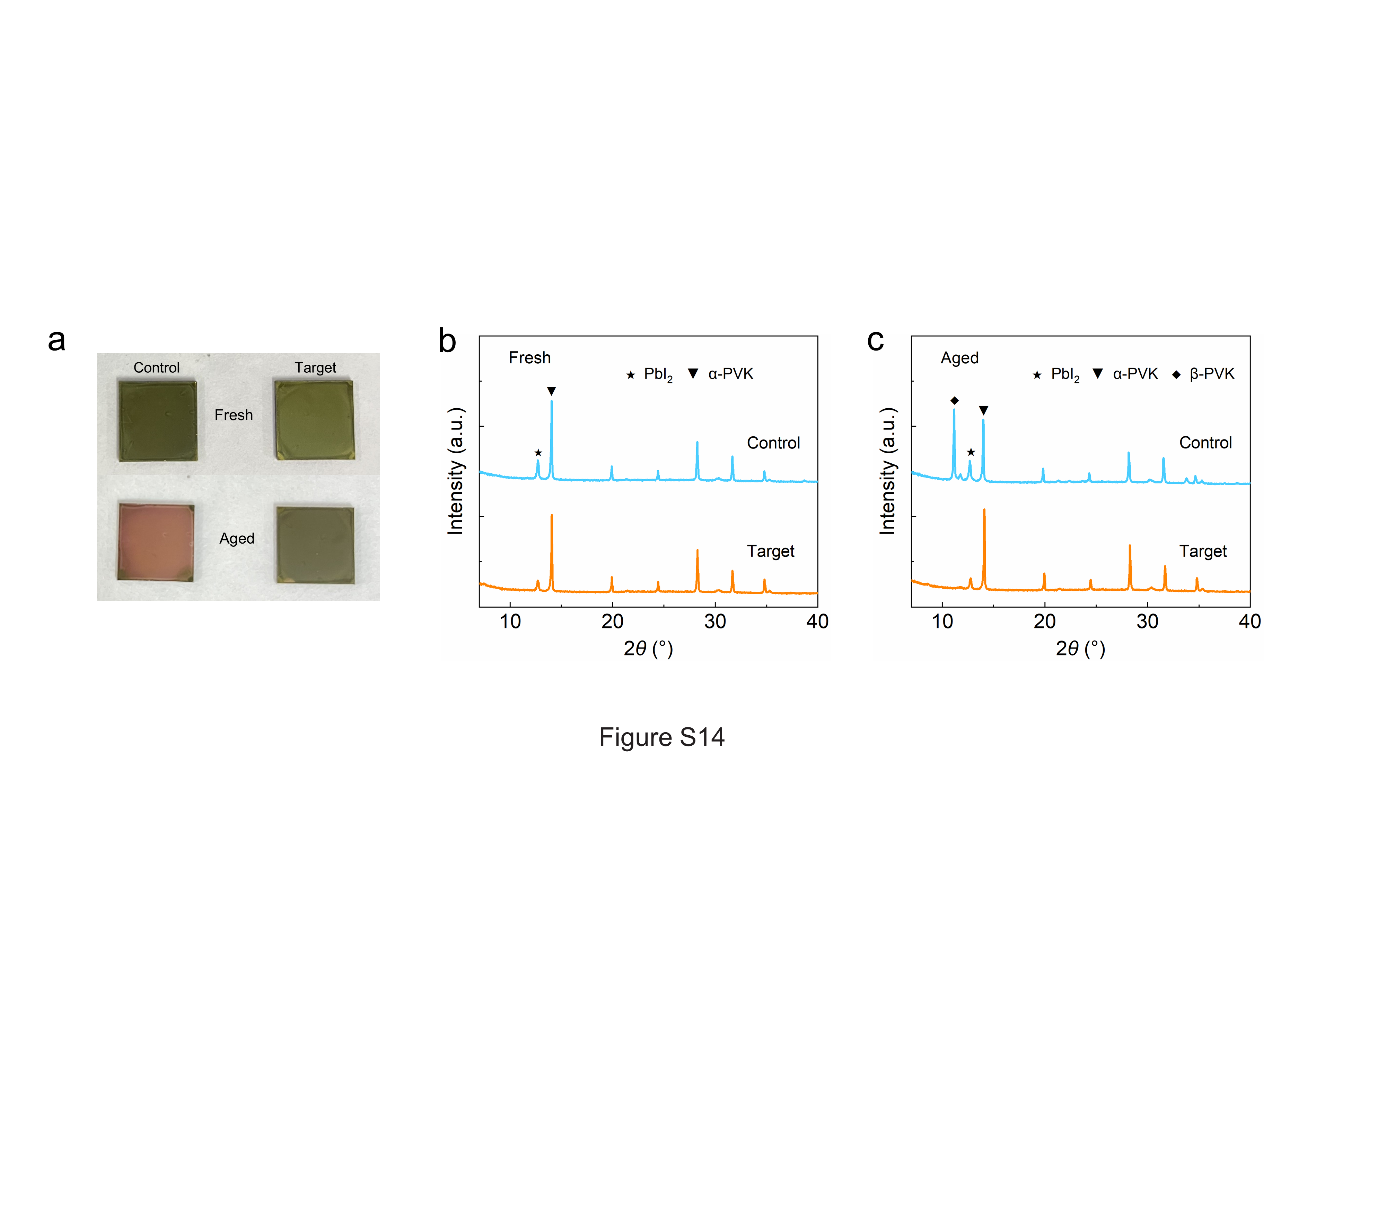


**Supplementary Figure 14. a** Optical images and XRD patterns of perovskite film with control and target P3HT **b** before and **c** after aging in air with 40% RH.

|  | *τ*1 (ns) | Rel. (%) | *τ*2 (ns) | Rel. (%) | *χ*2 |
| --- | --- | --- | --- | --- | --- |
| PVK | 59.4 | 0.44 | 955.3 | 99.56 | 1.05 |
| PVK/Control HTL | 2.7 | 12.15 | 27.5 | 87.85 | 1.09 |
| PVK/Target HTL | 1.6 | 1.73 | 76.0 | 98.27 | 1.01 |

**Supplementary Table 1.** Fitted TRPL lifetime of perovskite and perovskite with control and target HTL.

|  | *V*oc (V) | *J*sc (mA/cm2) | FF (%) | PCE (%) |
| --- | --- | --- | --- | --- |
| Control | 1.10 | 24.76 | 81.74 | 22.29 |
| Target-9mg | 1.10 | 24.98 | 83.20 | 22.90 |
| Target-12mg | 1.11 | 24.44 | 78.00 | 21.21 |

**Supplementary Table 2.** Effect of LiTFSI concentration in target HTL on photovoltaic performance.

|  | *V*oc (V) | *J*sc (mA/cm2) | FF (%) | PCE (%) |
| --- | --- | --- | --- | --- |
| 12-crown-4 | 1.10 | 24.98 | 83.20 | 22.90 |
| 15-crown-5 | 1.07 | 24.79 | 76.11 | 20.25 |
| 18-crown-6 | 1.12 | 23.35 | 72.38 | 18.90 |

**Supplementary Table 3.** Effect of different crown ether in HTL on photovoltaic performance.

|  | *V*oc (V) | *J*sc (mA/cm2) | FF (%) | PCE (%) |
| --- | --- | --- | --- | --- |
| Control | 1.10 | 24.76 | 81.74 | 22.29 |
| Target-4μl | 1.11 | 24.90 | 80.80 | 22.31 |
| Target-6μl | 1.10 | 24.98 | 83.20 | 22.90 |

**Supplementary Table 4.** Effect of 12-crown-4 content in target HTL on photovoltaic performance.
